1 **Rtn4a promotes exocytosis in mammalian cells while ER morphology does not**  
2 **necessarily affect exocytosis and translation**

3  
4  
5  
6  
7  
8  
9  
10  
11  
12  
13  
14  
15  
16  
17  
18  
19  
20  
21  
22  
23  
24  
25  
26  
27  
28  
29

Richik Nilay Mukherjee<sup>1</sup>, Zhaojie Zhang<sup>2</sup>, Daniel L. Levy<sup>1,\*</sup>

<sup>1</sup> Department of Molecular Biology, University of Wyoming, Laramie, WY, 82071

<sup>2</sup> Department of Zoology and Physiology, University of Wyoming, Laramie, WY, 82071

\*Corresponding author:  
Daniel L. Levy  
University of Wyoming  
Department of Molecular Biology  
1000 E. University Avenue  
Laramie, WY, 82071  
Phone: 307-766-4806  
Fax: 307-766-5098  
E-mail: [dlevy1@uwyo.edu](mailto:dlevy1@uwyo.edu)

Running Head: Rtn4a promotes exocytosis

Abbreviations: ER, endoplasmic reticulum; RER, rough ER; SER, smooth ER; tER, transitional ER; ERES, ER exit sites; Rtn, reticulon; EndoH, endoglycosidase H; ConA, concanavalin A; FBLN5, fibulin-5; TSP1, thrombospondin-1; ERGIC, ER-Golgi intermediate compartment; CNS, central nervous system; RHD, reticulon homology domain.

Key words: endoplasmic reticulum, reticulon 4a, exocytosis, ER morphology

## 30 **ABSTRACT**

31 ER tubules and sheets conventionally correspond to smooth and rough ER, respectively.  
32 The ratio of ER tubules-to-sheets varies in different cell types and changes in response  
33 to cellular conditions, potentially impacting the functional output of the ER. To directly  
34 test if ER morphology impacts ER function, we increased the tubule-to-sheet ratio by  
35 Rtn4a overexpression and monitored effects on protein translation and trafficking. While  
36 expression levels of several cell surface and secreted proteins were unchanged, their  
37 exocytosis was increased. Rtn4a depletion reduced cell surface trafficking without  
38 affecting ER morphology, and increasing the tubule-to-sheet ratio by other means did  
39 not affect trafficking. These data suggest that Rtn4a enhances exocytosis independently  
40 of changes in ER morphology. We demonstrate that Rtn4a enhances ER-to-Golgi  
41 trafficking and co-localizes with COPII vesicles. We propose that Rtn4a promotes COPII  
42 vesicle formation by inducing membrane curvature. Taken together, we show that  
43 altering ER morphology does not necessarily affect protein synthesis or trafficking, but  
44 that Rtn4a specifically enhances exocytosis.

45

## 46 **INTRODUCTION**

47 How organelle size and morphology affect organelle function is a fundamental  
48 question in cell biology. In this study, we investigated how morphology of the  
49 endoplasmic reticulum (ER) affects its functional output. The ER is an elaborate and  
50 dynamic membrane bound organelle that is continuous with the nuclear envelope. The  
51 ER network is composed of flat cisternae or sheets and arrays of highly curved tubules  
52 interconnected by three-way junctions (Shibata et al., 2006; Urra and Hetz, 2012; Goyal  
53 and Blackstone, 2013). Despite sharing a common luminal space, different ER domains  
54 are associated with distinct functions. Flat ER sheets correspond to rough ER (RER),  
55 accommodate large polyribosomes on their surface, and play major roles in protein  
56 translation, folding, and modification. Smooth ER (SER) is composed of ER tubules that  
57 generally exhibit low ribosome density because high membrane curvature disfavors  
58 binding of polyribosomal structures (Shibata et al., 2006; Goyal and Blackstone, 2013).  
59 Rather, ER tubules are involved in lipid synthesis, carbohydrate metabolism, calcium  
60 homeostasis, and interorganelle contacts (Park and Blackstone, 2010; Shibata et al.,

61 2010; Goyal and Blackstone, 2013). Discrete specialized domains of the SER termed  
62 transitional ER (tER) or ER exit sites (ERES) represent sites of COPII coat assembly  
63 and vesicle budding (Hughes and Stephens, 2008). Vesicles packed with cargo proteins  
64 and lipids arise from ERES and traffic towards the Golgi apparatus through post-ER  
65 structures known as pre-Golgi intermediates (Lippincott-Schwartz et al., 2000; Hughes  
66 et al., 2009).

67 Multiple proteins contribute to the unique structures characteristic of different ER  
68 domains. ER tubules are curved by the Reticulon (Rtn) and DP1/REEP/Yop1p family of  
69 proteins, all of which contain two tandem hydrophobic hairpin segments, termed  
70 reticulon-homology domains (RHDs), thought to wedge into the outer leaflet of  
71 phospholipid bilayers to induce membrane curvature (Voeltz et al., 2006; Shibata et al.,  
72 2008; Goyal and Blackstone, 2013; Zhang and Hu, 2016). Although predominantly  
73 localized to ER tubules, reticulons also occupy the curved edges of ER sheets (Shibata  
74 et al., 2009; Shibata et al., 2010). There are four mammalian reticulon genes (*RTN1*,  
75 *RTN2*, *RTN3*, and *RTN4/Nogo*) that can give rise to alternatively spliced transcripts  
76 (Oertle and Schwab, 2003; Yang and Strittmatter, 2007). The C-terminal RHD is highly  
77 conserved among all reticulons, while their N-termini exhibit little or no sequence  
78 similarity (GrandPré et al., 2000). Rtn4a is the largest in the reticulon family and was  
79 originally identified as an inhibitor of neurite outgrowth and axonal regeneration in the  
80 central nervous system (Chen et al., 2000; GrandPré et al., 2000; Prinjha et al., 2000;  
81 Oertle and Schwab, 2003; Yang and Strittmatter, 2007; Zurek et al., 2011; Di Sano et al.,  
82 2012). While most reticulons, including Rtn4a and its shorter splice variants Rtn4b and  
83 Rtn4c, are enriched in the nervous system, they are also ubiquitously expressed in all  
84 tissues and localize to curved ER tubules and sheet edges (Chiurchiu et al., 2014;  
85 Ramo et al., 2016). The flat regions of ER sheets are supported by coiled-coil domain  
86 containing proteins, such as CLIMP-63, kinectin, and p-180. CLIMP-63 stabilizes a  
87 constant sheet width of 50-100 nm in mammals by forming intraluminal bridges,  
88 whereas p-180 and kinectin are thought to form rod-like structures on the surface of ER  
89 sheets to promote flatness (Klopfenstein et al., 2001; Voeltz and Prinz, 2007; Lin et al.,  
90 2012; Goyal and Blackstone, 2013).

91 Cells with specialized functions are enriched in specific ER morphologies. For

92 example, pancreatic acinar cells and plasma cells, which produce and secrete large  
93 amounts of protein, are mostly populated with polyribosome studded ER sheets. In  
94 contrast, cells involved in carbohydrate metabolism (e.g. hepatocytes), steroid hormone  
95 synthesis (e.g. adrenal cortical cells), and  $\text{Ca}^{+2}$  signaling (e.g. muscle cells) are  
96 enriched in smooth tubular ER (Black, 1972; Shibata et al., 2006; Friedman and Voeltz,  
97 2011; West et al., 2011; Goyal and Blackstone, 2013). The unfolded protein response  
98 and ER stress induced by excess fatty acids lead to expansion of ER sheets, which is  
99 energetically more favorable than ER tubule expansion and is thought to provide more  
100 space for protein folding (Schuck et al., 2009; Friedman and Voeltz, 2011; Wikstrom et  
101 al., 2013). Thus while correlations between ER morphology and function have been  
102 described in certain specialized cell types and in response to cellular conditions, the  
103 question remains whether ER morphology directly affects the functional output of the  
104 ER.

105 In our study, we manipulated the ER tubule-to-sheet ratio to test if this broadly  
106 impacts protein translation and trafficking, functional roles ascribed to the RER and SER,  
107 respectively. We overexpressed the tubule shaping protein Rtn4a/Nogo-A in HeLa cells  
108 to increase the ER tubule-to-sheet ratio, a previously validated approach to alter ER  
109 morphology (Voeltz et al., 2006; Puhka et al., 2007; Shibata et al., 2010; Romero-Brey  
110 and Bartenschlager, 2016). We examined a number of cell surface and secreted  
111 proteins, finding that while their total levels were unchanged upon Rtn4a overexpression,  
112 their trafficking through the secretory pathway was increased. We show that this effect  
113 on exocytosis is in fact not due to altered ER morphology, but is rather a specific  
114 function of Rtn4a. We also provide evidence that Rtn4a accelerates ER-to-Golgi  
115 trafficking by promoting COPII vesicle formation. Thus our data suggest that altering ER  
116 morphology does not necessarily influence protein translation and trafficking, but that  
117 Rtn4a has a specific function in promoting COPII-mediated exocytosis.

118

## 119 **RESULTS**

### 120 **Rtn4a overexpression increases trafficking of cell surface proteins without** 121 **changing their overall expression levels**

122 HeLa cells were transiently transfected with plasmids expressing Rtn4a-GFP or

123 GFP-NLS as a control, and overexpression of Rtn4a was confirmed by western blot and  
124 immunofluorescence (**Fig. S1, A-D**). Based on immunoblotting, Rtn4a levels were  
125 increased  $8.8 \pm 1.5$  fold (average  $\pm$  SD) compared to controls (**Fig. S1, A-B**). This level  
126 of ectopic Rtn4a expression did not cause ER stress as evidenced by constant levels of  
127 the ER chaperones calnexin, ERp72, and GRP78 (**Fig. S1, E-H**). To quantify Rtn4a-  
128 induced conversion of ER sheets into tubules, we stained cells for the ER sheet marker  
129 CLIMP63 (**Fig. S1, I**). Rtn4a expression increased the relative proportion of tubular ER  
130 (**Fig. S1, C**) with a concomitant  $2.6 \pm 0.2$  fold reduction in ER sheet volume (**Fig. S1, J**).  
131 To assess how this change in ER morphology might affect protein synthesis and  
132 trafficking, we focused on two cell surface plasma membrane proteins whose transit  
133 through the secretory pathway has been well studied, Integrin $\beta$ 1 and MHC class I/HLA-  
134 A (Akiyama et al., 1989; Gawantka et al., 1992; Jones et al., 1996; Sun et al., 2009;  
135 Rose et al., 2014). Total staining intensity for Integrin $\beta$ 1 and HLA-A was unchanged  
136 upon Rtn4a overexpression, indicating that reducing ER sheet volume does not reduce  
137 synthesis of these two proteins (**Fig. 1, E-H**). Surprisingly, staining of non-permeabilized  
138 cells revealed greater cell surface levels of these membrane proteins in Rtn4a-  
139 transfected cells, by  $1.4 \pm 0.1$  fold for Integrin $\beta$ 1 and  $3.2 \pm 0.3$  fold for HLA-A (**Fig. 1, A-**  
140 **D**). Rtn4a overexpression also increased the cell surface transport, but not total levels,  
141 of Integrin $\beta$ 1 and HLA-A in MRC-5 cells, a non-cancerous lung fibroblast cell line (**Fig.**  
142 **S1, O-V**). Thus in both a normal and cancer cell line, Rtn4a overexpression enhanced  
143 trafficking of Integrin $\beta$ 1 and HLA-A to the cell surface without affecting their overall  
144 levels.

145 We reasoned that enhanced trafficking of Integrin $\beta$ 1 and HLA-A through the  
146 secretory pathway might lead to faster and overall increased maturation of these  
147 proteins. While immature N-glycoproteins in the ER lumen and cis-Golgi are sensitive to  
148 cleavage by endoglycosidase H (EndoH), mature glycoproteins become EndoH-resistant  
149 after terminal mannose removal by mannosidase II in the medial Golgi. Whole cell  
150 lysates from control and Rtn4a-GFP transfected cells were treated with EndoH or buffer  
151 alone and immunoblotted for Integrin $\beta$ 1 and HLA-A, allowing for quantification of mature,  
152 EndoH-resistant protein levels (**Fig. 2, A and C**). While total levels of Integrin $\beta$ 1 and  
153 HLA-A were unaffected by Rtn4a overexpression, consistent with our

154 immunofluorescence results, mature forms of Integrin $\beta$ 1 and HLA-A were increased by  
155  $2.8 \pm 0.8$  fold and  $1.8 \pm 0.4$  fold, respectively (**Fig. 2, B and D**). To assess all cell  
156 surface glycoproteins, non-permeabilized cells were stained with concanavalin A (ConA)  
157 which detects immature, high mannose N-glycans. Rtn4a overexpression decreased  
158 cell surface ConA-staining intensity by  $1.2 \pm 0.03$  fold without affecting total ConA-  
159 staining levels (**Fig. S1, K-N**), suggesting an increased presence of mature  
160 glycoproteins on the cell surface. Because the levels of key Golgi glycosyltransferases  
161 were unchanged upon Rtn4a overexpression (data not shown), Rtn4a does not appear  
162 to enhance protein maturation by modulating the protein glycosylation machinery.  
163 Instead, we propose that Rtn4a promotes exocytic trafficking, thereby leading to  
164 accelerated Golgi transport, N-glycosylation, and maturation. Taken together, these  
165 data show that Rtn4a overexpression, which converts ER sheets to tubules, promotes  
166 trafficking of two membrane glycoproteins to the cell surface without influencing their  
167 overall expression levels.

168

### 169 **Rtn4a promotes trafficking of cell surface proteins independently of effects on ER** 170 **morphology**

171 While Rtn4a overexpression did not induce ER stress and increased trafficking of  
172 cell surface proteins, indicating that overexpression was not having dominant negative  
173 effects on cell function, we also wanted to test the consequences of Rtn4a depletion.  
174 HeLa cells transfected with siRNA against Rtn4 exhibited reduced Rtn4 expression (**Fig.**  
175 **3, A-B**), with Rtn4a levels decreased by  $4.3 \pm 0.9$  fold based on immunoblotting (**Fig.**  
176 **S2, A-C**). Rtn4 knockdown reduced cell surface levels of Integrin $\beta$ 1 and HLA-A by  $1.2 \pm$   
177  $0.1$  fold and  $1.3 \pm 0.1$  fold, respectively (**Fig. 3, C-F**). Consistent with previous studies  
178 showing that Rtn1, 3, and 4 must be co-depleted to allow for conversion of ER tubules  
179 into sheets (Voeltz et al., 2006; Anderson and Hetzer, 2008; Christodoulou et al., 2016),  
180 we observed no change in ER sheet volume in Rtn4 knockdown cells (**Fig. 3, G-H**).  
181 These results suggest that Rtn4 influences protein trafficking independently of any  
182 effect on ER morphology.

183 To test if altering ER morphology through Rtn4a-independent means would  
184 impact exocytosis, we overexpressed two other curvature stabilizing ER membrane

185 proteins – REEP5 and Rtn4b. Overexpressing REEP5 decreased ER sheet volume 2.9  
186  $\pm$  0.04 fold (**Fig. S2, D-G**), similar to the 2.6-fold reduction in ER sheet volume induced  
187 by Rtn4a overexpression (**Fig S1, I-J**), but had no effect on the amount of surface  
188 localized Integrin $\beta$ 1 and HLA-A (**Fig. S2, H-J**). Consistent with these results, a  $6.9 \pm 1.8$   
189 fold increase in Rtn4b expression led to a  $2.3 \pm 0.2$  fold reduction in ER sheet volume  
190 (**Fig. S2, K-N**) without changing the levels of Integrin $\beta$ 1 and HLA-A on the cell surface  
191 (**Fig. S2, O-Q**). Collectively, these data show that shifting ER morphology from sheets  
192 to tubules is not sufficient to enhance trafficking of membrane proteins to the cell  
193 surface, implying Rtn4a has a unique ER morphology-independent function in this  
194 process.

195

### 196 **Overexpression of Rtn4a increases the secretion of soluble proteins**

197 To test if Rtn4a promotes exocytosis of soluble proteins in addition to cell surface  
198 membrane proteins, we examined the secreted and intracellular levels of fibulin-5  
199 (FBLN5) and thrombospondin-1 (TSP1). FBLN5 and TSP1 are both extracellular matrix  
200 components ubiquitously expressed and secreted by many cells types (Lahav, 1993;  
201 Bornstein, 1995; Crawford et al., 1998; Albig and Schiemann, 2005). Rtn4a  
202 overexpression increased the amount of FBLN5 and TSP1 secreted into the media (**Fig.**  
203 **4, A and D**), without affecting their overall expression levels (**Fig. 4, C and F**). While the  
204 intracellular FBLN5 concentration was unchanged upon Rtn4a overexpression (**Fig. 4**  
205 **B**), the intracellular TSP1 concentration was reduced (**Fig. 4 E**), suggesting TSP1 might  
206 be trafficked faster than FBLN5. These data show that Rtn4a promotes exocytosis of  
207 soluble secreted proteins in addition to membrane-bound proteins.

208

### 209 **Rtn4a accelerates ER-to-Golgi trafficking**

210 To begin to address how Rtn4a might promote protein trafficking to the cell  
211 surface, we used the RUSH system to monitor transport of a fluorescent cargo through  
212 the exocytic pathway. HeLa cells were transiently co-transfected with a LAMP1-RUSH  
213 construct encoding mCherry-LAMP1 and streptavidin-li (Boncompain et al., 2012),  
214 along with Rtn4a-GFP or GFP-NLS as a control. Prior to biotin addition, mCherry-  
215 LAMP1 is trapped in the ER (**Fig. 5 A**; first row of images). After biotin addition and

216 LAMP1 release from the ER, we fixed cells at 15-minute intervals. While control cells  
217 exhibited compact LAMP1 localization in the perinuclear region 15 minutes after biotin  
218 addition, in Rtn4a-overexpressing cells LAMP1 was present in puncta dispersed  
219 throughout the cytoplasm (**Fig. 5 A**; second row of images). Similar LAMP1 cytoplasmic  
220 puncta were not observed in control cells until 45 minutes after biotin addition (**Fig. 5 A**;  
221 fourth row of images). These data suggest that LAMP1 exocytosis occurs more rapidly  
222 when Rtn4a is overexpressed.

223 To estimate when LAMP1 was entering the Golgi, cells were fixed at shorter time  
224 points after biotin addition and immunostained with the Golgi marker GRASP65 to  
225 assess co-localization of LAMP1 with the Golgi (**Fig. S3, A-D**). Just a few minutes after  
226 biotin addition, we observed significantly greater co-localization of LAMP1 with the Golgi  
227 in cells overexpressing Rtn4a compared to controls (**Fig. S3 E**), suggesting accelerated  
228 ER-to-Golgi transport. This prompted us to track ER-to-Golgi transport of LAMP1 by live  
229 cell imaging (**Fig. 6**). We monitored the accumulation of mCherry-LAMP1 signal in the  
230 presumptive Golgi as an increase in perinuclear fluorescence relative to peripheral ER  
231 fluorescence. Perinuclear LAMP1 fluorescence peaked 6 minutes after biotin addition in  
232 Rtn4a-overexpressing cells (**Fig. 6, D-F and H; Video S1B**), 9 minutes earlier than in  
233 control cells (**Fig. 6, A-C and G; Video S1A**). It appeared that the Golgi was more  
234 dispersed in Rtn4a-transfected cells (**Fig. 6 E**; 6 minutes after biotin addition) compared  
235 to control cells (**Fig. 6 B**; 15 minutes after biotin addition), which we confirmed by  
236 staining for GRASP65 and the medial Golgi marker ManII, observing a ~2-fold decrease  
237 in Golgi circularity and ~2-3 fold increase in Golgi volume upon Rtn4a overexpression  
238 (**Fig. 7, S3 F**). Golgi morphology was also altered in REEP5- and Rtn4b-overexpressing  
239 cells in which cell surface trafficking was unaffected (**Fig. S3, G-I**), suggesting that Golgi  
240 fragmentation and enlargement are not sufficient to increase exocytosis and that Rtn4a  
241 likely influences anterograde trafficking through another mechanism. Taken together,  
242 these data suggest that Rtn4a overexpression accelerates ER-to-Golgi transport, which  
243 in turn increases trafficking of proteins to the cell surface.

244

245 **Overexpressed Rtn4a increases Sec31A staining area and co-immunoprecipitates**  
246 **with Sec31A vesicles**



247 To begin to understand how Rtn4a might influence ER-to-Golgi vesicular  
248 trafficking, we immunostained cells with the ER exit site (ERES) marker Sec31A, a key  
249 component of the outer COPII coat that facilitates budding of anterograde vesicles out  
250 of the ER (Lippincott-Schwartz et al., 2000; Fromme and Schekman, 2005; Melero et al.,  
251 2018). While predominantly perinuclear in control cells, Sec31A appeared more  
252 scattered throughout the cytoplasm of Rtn4a-overexpressing cells and the Sec31A  
253 staining area was  $1.4 \pm 0.2$  fold greater (**Fig. 8, A-B**). Intriguingly, Sec31A puncta  
254 frequently co-aligned with cortical ER tubules labeled with Rtn4a-GFP (**Fig. 8, A and C**).  
255 Furthermore, in Sec31A co-immunoprecipitation experiments, overexpressed Rtn4a co-  
256 precipitated with immuno-isolated intact COPII vesicles, as did a small fraction of  
257 endogenous Rtn4a in control-transfected cells (**Fig. 8, D-E**). These data suggest that  
258 Rtn4a may promote budding of COPII vesicles, perhaps by inducing membrane  
259 curvature at ERES. Consistent with Rtn4a promoting anterograde trafficking, Rtn4a  
260 overexpression also led to more disperse staining of ERGIC53 (**Fig. S4, A-D**), a  
261 receptor for glycoprotein transport from ERES and a marker of transient pre-Golgi  
262 structures found in the ER-Golgi intermediate compartment (ERGIC) (Appenzeller et al.,  
263 1999; Lippincott-Schwartz et al., 2000; Fromme and Schekman, 2005). Moreover,  
264 Rtn4a overexpression scattered the distribution of COPI-coated retrograde vesicles (**Fig.**  
265 **S4, E-G**), suggesting that Golgi-to-ER retrograde traffic may also increase upon Rtn4a  
266 overexpression, possibly balancing enhanced forward transport (Lippincott-Schwartz et  
267 al., 2000).

268

### 269 **Overexpressed Rtn4a closely associates with Sec31A-containing vesicles and** 270 **tubules**

271 To test if overexpressed Rtn4a might promote recruitment of COPII coat  
272 components, we performed transmission electron microscopy on cells immuno-labeled  
273 for Rtn4a and Sec31A with 6 nm and 15 nm gold particles, respectively. Rtn4a and  
274 Sec31A were more frequently observed within the same tubular or vesicular  
275 compartments in Rtn4a-overpressing cells compared to control cells (**Fig. 9, A-B**).  
276 Because ER tubules are 50-100 nm in diameter (Bernales et al., 2006; Shibata et al.,  
277 2006) and COPII-coated vesicles are generally 60-70 nm wide (Fromme and Schekman,

278 2005), we reasoned that in order for Rtn4a and Sec31A to co-localize in the same  
279 membrane compartment, 6 and 15 nm gold particles should be at most 100 nm apart  
280 from each other. We therefore quantified the number of 6 nm particles within 100 nm of  
281 each 15 nm particle, which was  $3.9 \pm 0.3$  fold greater in Rtn4a-overexpressing cells  
282 compared to control cells (**Fig. 9 C**). Because this difference might be due to Rtn4a  
283 overexpression itself, we also quantified the density of 6 nm particles in regions devoid  
284 of Sec31A, finding that the Rtn4a particle density was  $1.6 \pm 0.1$  fold higher close to  
285 Sec31A as opposed to far from Sec31A in Rtn4a-overexpressing cells (**Fig. 9 C**). These  
286 data suggest that COPII coats are preferentially recruited to Rtn4a-containing  
287 membranes. Consistent with this idea, we also measured the distance between each 15  
288 nm (Sec31A) particle and the nearest 6 nm (Rtn4a) particle, observing a  $1.8 \pm 0.1$  fold  
289 decrease in this distance upon overexpression of Rtn4a (**Fig. 9 D**).

290 We also observed co-localization of Sec31A and Rtn4a in membrane structures  
291 that appeared morphologically distinct from canonical membrane vesicles (**Fig. S5, A-**  
292 **B**). These membrane structures protruded from enclosed membrane compartments and  
293 consisted of narrow tubular necks terminating in wider vesicular heads. Rtn4a was  
294 frequently observed in these structures and Sec31A tended to localize along the necks  
295 (**Fig. S5, A-B**). Perhaps Rtn4a can promote an alternative mode of vesicle budding at  
296 ERES whereby the COPII machinery pinches off a tubular vesicle instead of coating the  
297 vesicle surface. We also quantified a  $1.2 \pm 0.03$  fold decrease in ER tubule width upon  
298 Rtn4a overexpression (**Fig. S5 C**), consistent with the idea that Rtn4a-induced  
299 membrane constriction and curvature might promote recruitment of the COPII vesicle  
300 budding machinery.

301

## 302 **DISCUSSION**

303 We report that inducing a more tubular ER does not significantly influence protein  
304 synthesis levels in both HeLa cells and a normal lung fibroblast cell line. ER sheets are  
305 synonymous with rough ER, bound by translating polyribosomes and associated with  
306 protein biosynthesis, folding, and post-translational modification (Shibata et al., 2006).  
307 Conversely, smooth ER tubules are largely devoid of polyribosomes and are instead  
308 specialized for calcium signaling and lipid metabolism. Why might reducing ER sheet

309 volume have no effect on protein synthesis levels? One possibility is that active  
310 polyribosomes redistribute to the tubular ER in Rtn4a-overexpressing cells. However,  
311 our TEM images provided no evidence of increased polyribosomes on ER tubules (data  
312 not shown), consistent with the observation that ER tubules are only populated by non-  
313 translating single ribosomes and small polyribosomes (Shibata et al., 2006; Shibata et  
314 al., 2010), likely because the high curvature of the SER prevents recruitment of large,  
315 spiral polysomal structures. Rather we propose that the biosynthetic capacity of rough  
316 ER sheets is sufficiently high so that a ~2.6-fold reduction in ER sheet volume has no  
317 effect on overall protein levels. Consistent with this idea, our TEM images showed no  
318 significant change in the density of spiral polyribosomes on the RER upon Rtn4a  
319 overexpression (data not shown). Furthermore, converting ER tubules into sheets by  
320 overexpression of CLIMP63 did not increase synthesis of Integrin $\beta$ 1 and HLA-A (data  
321 not shown), again suggesting that the relative luminal volume of the RER does not  
322 directly impact the output of the translational machinery. Thus while there are  
323 specialized cell types that are enriched in rough ER sheets or tubular smooth ER  
324 (Friedman and Voeltz, 2011; Goyal and Blackstone, 2013), altering ER morphology in  
325 cells with a more traditional ER tubule-to-sheet ratio has little effect on overall protein  
326 synthesis levels.

327         While Rtn4a overexpression did not alter levels of protein synthesis, we did  
328 observe an increase in ER-to-Golgi trafficking and exocytosis of both membrane-bound  
329 and soluble proteins. This effect was likely not due to a change in ER morphology, as  
330 cell surface trafficking was unaffected by overexpression of two other ER tubule-  
331 promoting proteins, Rtn4b and REEP5, and Rtn4a knock down reduced trafficking  
332 without affecting ER morphology. Thus Rtn4a appears to have a specific function in  
333 enhancing anterograde transport. If ER morphology has little effect on protein  
334 translation and trafficking, how might Rtn4a specifically promote exocytosis? Rtn4a is  
335 known to induce membrane curvature (Voeltz et al., 2006; Shibata et al., 2008; Zurek et  
336 al., 2011), and COPII vesicle budding preferentially occurs at sites of high membrane  
337 curvature (Wang et al., 2017; Melero et al., 2018). As our immunofluorescence, co-  
338 immunoprecipitation, and immuno-TEM experiments all suggested co-localization of  
339 Rtn4a and Sec31A, we propose that membrane curvature induced by Rtn4a promotes

340 recruitment of the COPII coat machinery, thereby facilitating vesicle budding from ERES  
341 and enhancing overall exocytosis. REEP5 and Rtn4b overexpression did not alter  
342 protein transport to the cell surface, indicating that membrane curvature by itself cannot  
343 enhance trafficking and that Rtn4a must contain a unique structural element that  
344 confers this ability. The splice isoform Rtn4b lacks a unique N-terminal domain present  
345 in Rtn4a, suggesting that this region may be involved in promoting trafficking. It is worth  
346 noting that this same N-terminal region is also associated with Rtn4a's inhibitory effect  
347 on neurite outgrowth (GrandPré et al., 2000; Oertle and Schwab, 2003; Yan et al., 2006;  
348 Yang and Strittmatter, 2007), suggesting a potential link between these two functions.  
349 While C-terminal transmembrane domains in Rtn4 are known to induce membrane  
350 curvature, there is evidence that other domains of Rtn4a may also be important in  
351 shaping the tubular ER (Zurek et al., 2011). Perhaps unique biophysical properties of  
352 Rtn4a-induced membrane curvature contribute to enhanced exocytosis. Future studies  
353 will elucidate the structural elements of Rtn4a that enhance vesicular transport.

354 Our results with Rtn4a add to a growing literature on the role of reticulons in  
355 protein trafficking. Overexpression of RTN1C in rat PC12 adrenal tumor cells increased  
356 exocytosis of human growth hormone, mediated by interactions with the SNARE  
357 proteins syntaxin-1, -7, -13, and VAMP2 (Steiner et al., 2004; Di Sano et al., 2012).  
358 RTN3 has been shown to play a role in retrograde protein transport from the cis-Golgi  
359 and/or ERGIC to the ER. Notably, overexpression of RTN3 in HeLa cells delayed  
360 trafficking of VSVG from the ER to the cell surface and restricted ERGIC53 staining to  
361 the perinuclear region (Wakana et al., 2005). Combining these results with our own,  
362 perhaps Rtn3 and Rtn4a have antagonizing effects on the early secretory pathway.  
363 Previous studies support a role for Rtn4a in neuronal protein secretion. Rtn4a mRNA is  
364 highly expressed in the supraoptic nucleus and paraventricular nucleus of the rat  
365 hypothalamus, both regions being highly active for neuroendocrine secretion  
366 (Hasegawa et al., 2005), and RTN4A knockdown decreased dopamine release in rat  
367 PC12 cells (Xiong et al., 2008). Thus, while Rtn4a/Nogo-A has been implicated in  
368 protein secretion in the nervous system, our results show that Rtn4a plays a more  
369 general role in exocytosis, providing a potential mechanism that involves recruitment of  
370 the COPII vesicle budding machinery.

371 Finally, Rtn4a's capacity to enhance exocytosis might be relevant in cancer and  
372 neurodegenerative disease, where pathogenesis is often driven by abnormal secretion  
373 of growth factors, proteases, and neuropeptides (Daughaday and Deuel, 1991; Lynch  
374 and Mobley, 2000; Yan et al., 2006; Lodish et al., 2008). For example, Rtn4a protein is  
375 upregulated in malignant brain tumor (glioma) cells (Björling et al., 2008), concomitant  
376 with increased secretion of cathepsin B (McCormick, 1993), VEGF (Jensen et al., 2006),  
377 and chemokines (Jordan et al., 2008). Amyotrophic Lateral Sclerosis (ALS) is  
378 associated with motor neuron degeneration and skeletal muscle paralysis. High levels  
379 of Rtn4a were measured in the muscles of ALS patients as well as in mouse models of  
380 ALS. Knocking down RTN4A in ALS mice delayed disease progression and extended  
381 survival (Dupuis et al., 2002; Bruijn et al., 2004; Jokic et al., 2006). Given that Rtn4a is  
382 an inhibitor of neurite outgrowth and axonal regeneration, processes regulated by  
383 vesicular trafficking (Tojima and Kamiguchi, 2015), perhaps Rtn4a contributes to ALS  
384 by influencing exocytosis (Yang and Strittmatter, 2007). The pathogenesis of  
385 Parkinson's disease has also been linked to Rtn4a (More et al., 2013; Schawkat et al.,  
386 2015), with a possible mechanism being increased secretion of the inflammatory  
387 cytokines TNF $\alpha$  and IL-6 (Zhong et al., 2015). Future research will examine the potential  
388 disease links between Rtn4a and protein trafficking.

389

## 390 **MATERIALS AND METHODS**

### 391 **Plasmids and siRNA**

392 The Rtn4a-GFP (pAcGFP1-N1 Rtn4a) (Shibata et al., 2008) and mCherry-REEP5  
393 (pmCherry-C2 REEP5) (Schlaitz et al., 2013) mammalian expression plasmids were  
394 generous gifts from Gia Voeltz (University of Colorado, Boulder) and Anne Schlaitz  
395 (Zentrum für Molekulare Biologie der Universität Heidelberg), respectively. The RUSH  
396 construct Str-li\_LAMP1-SBP-mCherry was a gift from Franck Perez (Boncompain et al.,  
397 2012). The GFP-Rtn4b expression plasmid (pDL34) was described previously (Jevtić  
398 and Levy, 2015). The control GFP-NLS plasmid was from Invitrogen (V821-20). To  
399 knock down expression of RTN4, we used a DsiRNA (IDT): sense 5'-  
400 CUGGAAUCUGAAGUUGCUAUAUCUG-3', and antisense 5'-  
401 CAGAUAUAGCAACUUCAGAUUCCAG-3'. This DsiRNA sequence is based on a

402 previously described siRNA against RTN4 (Anderson and Hetzer, 2008).

403

### 404 **Mammalian Tissue Culture and Transfections**

405 HeLa cells were obtained from ATCC and MRC-5 normal human lung fibroblast cells  
406 were a gift from Jason Gigley (University of Wyoming). Cells were verified to be  
407 mycoplasma-free (ThermoFisher Scientific #M7006). Both cell lines were cultured in  
408 Eagle's minimum essential medium (EMEM), supplemented with 10% v/v fetal bovine  
409 serum (FBS) and 50 IU/ml of penicillin/streptomycin, at 37°C in 5% CO<sub>2</sub>. For transient  
410 transfection of plasmids, cells were seeded at 3 x 10<sup>5</sup> cells/well in 6-well plates and  
411 grown to 70–90% confluency. 2.5 µg of plasmid DNA were transfected per well using  
412 Lipofectamine 3000 (Invitrogen), following the manufacturer's protocol. For transient  
413 siRNA transfections, cells were grown in 6-well plates to 60-80% confluency. 25 pmol of  
414 siRNA were transfected per well using Lipofectamine RNAiMAX (Invitrogen), following  
415 the manufacturer's protocol. BLOCK-iT™ Alexa Fluor™ Red Fluorescent Control  
416 (Invitrogen) was used as a control and also co-transfected with RTN4 siRNA to identify  
417 transfected cells. The average transfection efficiency for each plasmid and siRNA was  
418 calculated from 3-5 independent experiments: 69.5% for GFP-NLS, 75.6% for Rtn4a-  
419 GFP, 62.2% for mCherry-REEP5, 72.4% for GFP-Rtn4b, 64.2% for BLOCK-iT Red  
420 Fluorescent Control alone, and 64.5% for the co-transfection of RTN4 siRNA with  
421 BLOCK-iT Red Fluorescent Control. To prepare cells for immunofluorescence analysis,  
422 transfected cells from each well were trypsinized using 450 µl of 1X Trypsin-EDTA  
423 solution (Sigma) at 24 h after transfection and transferred onto two acid-washed 18-mm  
424 square coverslips in 35-mm<sup>2</sup> dishes with 2 ml of fresh culture medium. 12 h later,  
425 culture medium was removed and coverslips were processed for immunofluorescence.  
426 To prepare cell pellets for whole cell lysates, medium was removed from the 6-well  
427 plates at 24 h post transfection and replaced with 2ml/well of fresh culture medium. 12 h  
428 later, cells were trypsinized, spun down at 3500 rpm for 5 min, and washed twice in  
429 PBS.

430

### 431 **Immunofluorescence**

432 36 h after transfection, coverslips were washed twice with phosphate-buffered saline

433 (PBS), fixed with 4% paraformaldehyde for 15 min, and then subjected to three 5 min  
434 washes with PBS. Cells were permeabilized for 7 – 10 min with 0.25% Triton-X-100 and  
435 washed thrice with PBS for 5 min each. Blocking was performed for 1 hr at room  
436 temperature with 10% normal goat serum (Sigma) supplemented with 0.3 M glycine and  
437 then incubated overnight at 4°C with primary antibody diluted in 1.5% normal goat  
438 serum. Cells were washed thrice in PBS for 5 min each and incubated at room  
439 temperature for 1 hr with secondary antibodies diluted in 1.5% normal goat serum  
440 supplemented with 2.5 µg/ml Hoechst. Cells were then washed thrice in PBS for 5 min  
441 each followed by two brief washes with sterile water. Finally, coverslips were mounted  
442 in Vectashield (Vector Laboratories) and sealed with nail polish. The following secondary  
443 antibodies were used at 1:500 dilutions: Alexa Fluor 488 and Alexa Fluor 568  
444 conjugated Goat Anti-Rabbit IgG (H+L) and Anti-Mouse IgG (H+L) (Invitrogen) and  
445 Alexa Fluor 405 conjugated Goat Anti-Rabbit IgG (H&L) (Abcam 175652). The Triton-X-  
446 100 incubation step was skipped for experiments requiring non-permeabilized cells.

447

#### 448 **Confocal Microscopy**

449 Imaging was performed with a spinning-disk confocal microscope based on an Olympus  
450 IX71 microscope stand equipped with a five-line LMM5 laser launch (Spectral Applied  
451 Research) and switchable two-fiber output to allow imaging through either a Yokogawa  
452 CSU-X1 spinning-disk head or TIRF illuminator. Confocal images were acquired with an  
453 ORCA-Flash4.0 V2 Digital CMOS C11440-22CU camera (ImagEM, Hamamatsu) using  
454 an Olympus PlanAPO 100x/1.40 oil objective (for fixed cells) or Olympus UPlanFLN  
455 60x/0.90 dry objective (for live cells). Z-axis focus was regulated using a piezo Pi-Foc  
456 (Physik Instrumente), and multiposition imaging was performed using a motorized Ludl  
457 stage. Image acquisition and all system components were controlled using MetaMorph  
458 software (Molecular Devices). All images were acquired using the same exposure time  
459 for a particular channel and experimental condition.

460

#### 461 **Quantification from Fixed Cell Imaging**

462 Unless otherwise noted, multiple z-stacks were acquired during fixed cell imaging for  
463 each cell, using a 0.2 µm z-slice thickness. Z-stacks were converted into maximum

464 intensity projections in ImageJ, thresholded using MetaMorph software (Molecular  
465 Devices), and mean fluorescence intensity per cell was measured from thresholded  
466 images. Finally, mean fluorescence intensities from all cells were averaged for each  
467 condition. In order to quantify ER sheet and Golgi volumes, z-stacks were reconstructed  
468 and thresholded in 3D using MetaMorph software and the voxel volume was calculated  
469 based on the thresholded isosurface. Circularity/compactness of Golgi structures was  
470 measured from maximum intensity projections as previously described (Zahnleiter et al.,  
471 2015). Briefly, images were thresholded in MetaMorph and regions of interest were  
472 defined around Golgi clusters. The perimeter and area of every Golgi component were  
473 quantified and circularity of the Golgi apparatus was calculated using the formula  $4\pi \times$   
474  $[\frac{\sum(\text{areas})}{\sum(\text{perimeters})}]^2$ . Staining areas of Sec31A and COP-A were  
475 measured from thresholded images in MetaMorph. ERGIC53 staining distribution was  
476 quantified from maximum intensity projections in ImageJ by drawing three straight lines  
477 per cell (up to 15  $\mu\text{m}$  in length) from the nuclear envelope to the cell periphery and  
478 measuring pixel intensities along the lines. Pixel intensities along the line scans were  
479 then averaged for all cells. For quantifying the colocalization of mCherry-LAMP1  
480 (magenta) and Golgi (cyan), 3 - 4 single z-slices with prominent Golgi membranes were  
481 selected for both channels. Golgi images were thresholded in MetaMorph and total  
482 Golgi areas were quantified. Next, images from both channels corresponding to a  
483 particular z-plane were merged such that 'white' pixels corresponded to co-localization.  
484 The total area covered by white pixels was quantified manually in MetaMorph by  
485 drawing regions of interest around every white/merged component. To calculate the  
486 LAMP1 fraction that co-localized with the Golgi, the colocalized area (white) was divided  
487 by the total Golgi area for 3 – 4 selected z-planes per cell. These values were averaged  
488 from all z-planes for every cell to produce a mean value for the LAMP1 fraction that co-  
489 localized with the Golgi. For publication, images were cropped and pseudocolored using  
490 ImageJ, but were otherwise unaltered.

491

## 492 **Live Cell Imaging and Quantification**

493 HeLa cells were transfected in 6-well plates as described previously. Cells from each  
494 well were trypsinized 24 h after transfection and divided into 8 wells of a chambered  $\mu$ -



495 Slide 8 Well (Ibidi – 80826) each containing 300  $\mu$ l of fresh media. 12 h later,  
496 chambered slides were placed in a stage top incubator (Tokai Hit – INUBG2A-ZILCS)  
497 and confocal imaging was performed at a single focal plane. ER trapped LAMP1 was  
498 released by adding 40  $\mu$ M D-Biotin to the media and time lapse imaging was started  
499 immediately. Images were acquired every 90 seconds and continued for 1 h 12 min. To  
500 quantify trafficking of LAMP1 through the secretory pathway, regions of interest of the  
501 same area were drawn around bright perinuclear LAMP1 puncta as well as dimmer  
502 perinuclear regions for every time point until 24 min post Biotin addition. Integrated  
503 densities of mCherry fluorescence were measured for the indicated regions in ImageJ.  
504 Integrated density for the brighter perinuclear LAMP1 signal was divided by the  
505 integrated density of the dimmer perinuclear LAMP1 signal at each time point to  
506 estimate accumulation of LAMP1 in the Golgi over time. Each of these ratios was then  
507 normalized to the lowest value in a time series for a given cell, averaged, and plotted as  
508 a function of time post ER release. Peaks were interpreted to represent the highest  
509 relative accumulation of LAMP1 in the Golgi for each condition.

510

### 511 **Western Blots**

512 Whole-cell lysates were prepared from tissue culture cell pellets at 36 h post  
513 transfection using SDS-PAGE sample buffer supplemented with benzonase nuclease  
514 (Sigma, E1014) and boiled for 5 min. Proteins were separated on SDS-PAGE gels (4–  
515 20% gradient) and transferred to PVDF membrane. Membranes were blocked in  
516 Odyssey PBS Blocking Buffer (Li-Cor, 927-40000). The primary and secondary  
517 antibodies were diluted in Odyssey PBS Blocking Buffer supplemented with 0.2%  
518 Tween-20. Anti- $\beta$ -actin was used as a loading control. The secondary antibodies used  
519 were anti-mouse IRDye-680RD (Li-Cor 925-68070) and anti-rabbit IRDye-800CW (Li-  
520 Cor 925-32211) at 1:20,000. Blots were scanned on a Li-Cor Odyssey CLx instrument  
521 and band quantification was performed with ImageStudio. For a given sample, Rtn4a  
522 band intensity was normalized to the actin signal.

523

### 524 **EndoH Digestion**

525 Whole cell lysate was prepared in RIPA buffer (50 mM Tris-HCl pH 7.5, 150 mM NaCl, 1%

526 NP-40, 0.5% Sodium Deoxycholate, 0.1% SDS, 1 mM DTT, 1x Sigma Fast Protease  
527 Inhibitor cocktail) for EndoH digestion. Cell pellets were obtained at 36 h post  
528 transfection, resuspended in ice-cold RIPA buffer, and allowed to lyse for 30 min on ice.  
529 After lysis, cells were spun down at 14,000 rpm for 10 min at 4°C. The supernatant was  
530 stored at -80°C or used immediately. Total protein concentration was measured using  
531 the EZQ™ Protein Quantitation Kit (Invitrogen). 5-10 µg of total protein (9 µl of lysate)  
532 were treated with Endo H<sub>f</sub> (New England Biolabs) for 1 h at 37°C, following the  
533 manufacturer's protocol. Untreated controls were supplemented with GlycoBuffer3 (New  
534 England Biolabs). Reactions were stopped by treatment with SDS-PAGE sample buffer  
535 containing benzonase nuclease (Sigma, E1014) and boiling for 5 min. Samples were  
536 separated on SDS-PAGE gels (4–20% gradient) and transferred to PVDF membrane for  
537 immunoblotting.

538

### 539 **Concanavalin A Staining**

540 Coverslips with cells were fixed 36 h post transfection and processed following the  
541 standard immunofluorescence protocol with or without permeabilization with 0.25%  
542 Triton-X-100. Blocking was performed with a 1% solution of glycoprotein free Bovine  
543 Serum Albumin (Sigma - A3059) in PBS for 1 h at room temperature. Coverslips were  
544 incubated with 10 µg/ml Biotinylated Concanavalin A (Vector Laboratories, a gift from  
545 Don Jarvis at the University of Wyoming) in PBS for 30 min at room temperature,  
546 followed by three 5 min washes with PBS. Cells were then stained with 5 µg/ml Texas  
547 Red Streptavidin (Vector Laboratories, a gift from Don Jarvis at the University of  
548 Wyoming) for 30 min at room temperature and washed thrice in PBS for 5 min each.  
549 Cells were stained for 5 min with Hoechst (5 µg/ml) and briefly washed thrice with PBS  
550 and twice with sterile water. Finally, coverslips were mounted in Vectashield (Vector  
551 Laboratories) and sealed with nail polish.

552

### 553 **Primary Antibodies**

| Antibody                            | Dilution              |
|-------------------------------------|-----------------------|
| Anti-Rtn4a/Nogo A - Abcam (ab62024) | IF – 1:50; WB – 1:500 |

|                                                           |                                           |
|-----------------------------------------------------------|-------------------------------------------|
| Anti-Climp63/CKAP4 – Invitrogen (PA5-42926)               | IF – 1:100                                |
| Anti-Integrin $\beta$ 1 – Invitrogen (PA5-29606)          | IF – 1:100                                |
| Anti-HLA-A – Santa Cruz Biotechnology (sc-390473)         | IF – 1:60                                 |
| Anti-Integrin $\beta$ 1 – Bethyl Laboratories (A303-735A) | WB – 1:1000                               |
| Anti-HLA-A – Boster Bio (PB9376)                          | WB – 1:500                                |
| Anti-GRASP65 – Invitrogen (PA3-910)                       | IF – 1:100                                |
| Anti-Mannosidase II – EMD Millipore (AB3712)              | IF – 1:200                                |
| Anti-Sec31A – Santa Cruz Biotechnology (sc-376587)        | IF – 1:60; WB – 1:250; IP – 20 $\mu$ g/ml |
| Anti-VSV-G Tag – Invitrogen (PA1-29903)                   | IF – 1:250                                |
| Anti-Calnexin – Enzo Life Sciences (ADI-SPA-860-D)        | WB – 1:1000                               |
| Anti- $\beta$ -Actin – Abcam (ab8224)                     | WB – 1:1000                               |
| Anti-ERp72 – ProSci (8211)                                | WB – 1:1000                               |
| Anti-GRP78 - Assay Biotech (C0217)                        | WB – 1:500                                |
| Anti-ERGIC53/LMAN1 – OriGene (TA502137)                   | IF – 1:100                                |
| Anti-REEP5 – Abcam (ab76451)                              | IF – 1:100                                |
| Anti-COP-A – Aviva Systems Biology (ARP51894_P050)        | IF – 1:400                                |
| Anti-Rtn4/Nogo – Santa Cruz Biotechnology (sc-271878)     | IF – 1:75                                 |
| Anti-Rtn4 – Aviva Systems Biology (ARP46812_P050)         | WB – 1:500                                |

554

## 555 **Nucleofection and ELISA**

556 Nucleofection of HeLa cells was performed using a Lonza 4D-Nucleofector™ device  
557 and Amaxa™ SE Cell Line 4D-Nucleofector™ X Kit (Lonza - V4XC-1024), according to  
558 the manufacturer's protocol.  $5.8 \times 10^5$  cells were used per reaction. Post-nucleofection,  
559 cells were immediately seeded into 12 well plates containing 900  $\mu$ l of medium per well.  
560 12 h later, the conditioned medium was removed, spun down at 5000 rpm for 5 min at  
561 room temperature, and the supernatant was collected. The cells from each well were

562 trypsinized, counted using a hemocytometer, and lysed in 50  $\mu$ l of RIPA buffer. Both the  
563 media supernatant and whole cell lysate were subjected to sandwich ELISA. ELISAs  
564 were performed using FBLN5 (Fibulin-5) Human ELISA Kit from Fine Test (EH0772)  
565 and Thrombospondin 1 (TSP1) Human ELISA Kit from Invitrogen (BMS2100), following  
566 the manufacturer's protocols. ELISA plates were read at 450 nm using a Wallac 1420  
567 Victor2 Microplate Reader (Perkin Elmer, provided by Don Jarvis at the University of  
568 Wyoming). Whole cell lysate was diluted 1:10 in ELISA assay buffers. FBLN5 and TSP1  
569 concentrations (ng/ml) were quantified in media (secreted) and whole cell lysate  
570 (intracellular) from standard curves. Total protein amounts (picograms) present in 900  $\mu$ l  
571 of media and 50  $\mu$ l of cell lysate were calculated. These values were normalized to the  
572 number of live cells per well. Secreted and intracellular protein amounts were added to  
573 calculate the total protein amount per cell. Data from three independent experiments  
574 were averaged. Average nucleofection efficiencies for GFP-NLS and Rtn4a-GFP were  
575 71.6% and 82.2% respectively, calculated from three independent experiments.

576

#### 577 **Immuno-isolation of Sec31A/COPII Vesicles**

578 HeLa cells were nucleofected with plasmids expressing GFP-NLS or Rtn4a-GFP in  
579 triplicate ( $6.5 \times 10^5$  cells per reaction) as previously described and seeded in T25 flasks  
580 containing 3 ml fresh culture medium. 24 h post-nucleofection, medium was removed  
581 and cells were scraped into 2.5 ml ice cold PBS (without  $\text{Ca}^{2+}$  and  $\text{Mg}^{2+}$ )  
582 supplemented with 10  $\mu$ g/ml each of leupeptin, pepstatin, and chymostatin. Cells were  
583 spun down at 2,000 rpm for 3 min at 4°C and the pellets were resuspended in 1.5 ml ice  
584 cold Homogenization Buffer (250 mM Sucrose, 25 mM KCl, 10 mM HEPES pH=7.2, 1  
585 mM EGTA, and 1x Sigma Fast Protease Inhibitor cocktail), as previously described  
586 (Syed et al., 2017). Cell suspensions were homogenized by passing through a 25-  
587 gauge syringe needle (10 times) and homogenates were centrifuged (600 g for 5 min)  
588 twice at 4°C. The final supernatant (Post Nuclear Supernatant) containing intact  
589 membrane vesicles was used for immunoprecipitation using Pierce™ Protein A/G  
590 Magnetic Beads (Thermo Scientific), following the manufacturer's protocol. A detergent-  
591 free wash buffer (Tris Buffered Saline) was used to maintain the integrity of immuno-  
592 isolated vesicles and all steps were performed at 4°C. 10  $\mu$ g of anti-Sec31A antibody

593 (Santa Cruz Biotechnology; sc-376587) or normal mouse IgG2a (Santa Cruz  
594 Biotechnology; sc-3878) were used per reaction. Proteins in immuno-isolated  
595 membrane vesicles were eluted in 50  $\mu$ l of SDS-PAGE sample buffer and boiled for 5  
596 min. 30  $\mu$ l aliquots were separated on SDS-PAGE gels (4–20% gradient) and  
597 transferred onto PVDF membrane for immunoblotting with anti-Sec31A and anti-Rtn4a  
598 antibodies.

599

### 600 **Immuno Electron Microscopy**

601 Cells from three independent transfection reactions were collected at 36 h post  
602 transfection and processed for immuno electron microscopy, following a previously  
603 described protocol (Phend et al., 1995). Briefly, cells were fixed with 4%  
604 paraformaldehyde + 0.5% glutaraldehyde in PBS at room temperature for 1.5 h and  
605 embedded in 2% low melting point agarose. Agarose cubes containing cells were rinsed  
606 with ddH<sub>2</sub>O three times for 5 min each and treated with 1% tannic acid in PBS for 1 h at  
607 room temperature. After three 5 min washes with ddH<sub>2</sub>O, agarose cubes were  
608 incubated with 2% uranyl acetate at room temperature for 1.5 h. Embedded cells were  
609 sequentially dehydrated in 10%, 20%, and 40% ethanol (10 min each), then 60% and  
610 80% ethanol (20 min each), then 100% ethanol (three times, 15 min each). Next,  
611 infiltration was performed in 1:2 (v/v) LR White Resin (LRW):ethanol (100%) for 1.5 hr,  
612 2:1 (v/v) LRW:ethanol (100%) for 1 hr, and then 100% LRW overnight at room  
613 temperature. Finally, cell blocks were sealed in beam capsules filled with LRW and  
614 polymerized overnight at 4–8°C under UV radiation. Polymerized blocks were trimmed  
615 and cut into 50 – 60 nm sections using an ultramicrotome and 3 sections were collected  
616 on each formvar-carbon coated nickel grid. For immuno-labeling, grids were blocked for  
617 nonspecific binding with 10% normal goat serum in PBS for 1 h at room temperature.  
618 Grids were then incubated with rabbit anti-Rtn4a antibodies (Abcam) and mouse anti-  
619 Sec31A antibodies (Santa Cruz) diluted 1:20 in 1.5% goat serum overnight at 4°C,  
620 followed by three 5 min rinses in PBS. The grids were blocked again for 1 h at room  
621 temperature and incubated for 2 h with 1:20 Goat-Anti-Rabbit IgG antibodies (H+L)  
622 (EMS 25104) and 1:10 Goat-Anti-Mouse IgG (H+L) (EMS 25133) antibodies coupled  
623 with 6 nm and 15 nm gold particles, respectively, diluted in 1.5% goat serum. The grids

624 were rinsed three times 5 min in PBS, stained with lead citrate for 30-60 sec, rinsed  
625 extensively in ddH<sub>2</sub>O, and air dried. All grids were imaged with a Hitachi H-7000  
626 transmission electron microscope, equipped with a 4K×4K Gatan digital camera (Gatan,  
627 Inc., Pleasanton, CA). For each condition, 5 – 7 1513nm x 1513nm images were  
628 acquired from each section, for 7 - 10 sections from 3 grids. 8 – 10 sections were used  
629 from each polymerized block and 2 blocks were used per condition. All quantifications  
630 were performed in ImageJ and images were cropped to 500 nm x 500 nm for  
631 publication. All reagents for electron microscopy and secondary antibodies for immuno-  
632 gold labelling were purchased from Electron Microscopy Sciences.

633

### 634 **Statistics**

635 Averaging and statistical analysis were performed for independently repeated  
636 experiments. Unpaired t-tests were performed using GraphPad Software to evaluate  
637 statistical significance. The p-values, number of independent experiments, and error  
638 bars are denoted in the figure legends.

639

### 640 **ACKNOWLEDGEMENTS**

641 We thank David Fay and Amy Navratil for critical reading of the manuscript.

642

### 643 **COMPETING INTERESTS**

644 No competing interests declared.

645

### 646 **FUNDING**

647 Research in the Levy lab is supported by funding from the National Institutes of  
648 Health/National Institute of General Medical Sciences (R01GM113028) and the  
649 American Cancer Society (RSG-15-035-01-DDC).

650

### 651 **AUTHOR CONTRIBUTIONS**

652 Conceptualization, R.N.M., D.L.L.; Formal Analysis, R.N.M.; Investigation, R.N.M.  
653 performed all experiments; Z.Z. provided electron microscopy technical assistance;  
654 Resources, Z.Z.; Writing – Original Draft, R.N.M., D.L.L.; Writing – Review & Editing,

655 R.N.M., Z.Z., D.L.L.; Funding Acquisition, D.L.L.; Supervision, D.L.L.

656

## 657 REFERENCES

658 **Akiyama, S., Yamada, S. and Yamada, K.** (1989). Analysis of the role of glycosylation  
659 of the human fibronectin receptor. *Journal of Biological Chemistry* **264**, 18011-18018.

660 **Albig, A. R. and Schiemann, W. P.** (2005). Fibulin-5 function during tumorigenesis.

661 **Anderson, D. J. and Hetzer, M. W.** (2008). Reshaping of the endoplasmic reticulum  
662 limits the rate for nuclear envelope formation. *J Cell Biol* **182**, 911-924.

663 **Appenzeller, C., Andersson, H., Kappeler, F. and Hauri, H.-P.** (1999). The lectin  
664 ERGIC-53 is a cargo transport receptor for glycoproteins. *Nature cell biology* **1**, 330.

665 **Bernales, S., McDonald, K. L. and Walter, P.** (2006). Autophagy counterbalances  
666 endoplasmic reticulum expansion during the unfolded protein response. *PLoS*  
667 *biology* **4**, e423.

668 **Black, V. H.** (1972). The development of smooth - surfaced endoplasmic reticulum in  
669 adrenal cortical cells of fetal guinea pigs. *American Journal of Anatomy* **135**, 381-  
670 417.

671 **Boncompain, G., Divoux, S., Gareil, N., de Forges, H., Lescure, A., Latreche, L.,**  
672 **Mercanti, V., Jollivet, F., Raposo, G. and Perez, F.** (2012). Synchronization of  
673 secretory protein traffic in populations of cells. *Nature methods* **9**, 493-498.

674 **Bornstein, P.** (1995). Diversity of function is inherent in matricellular proteins: an  
675 appraisal of thrombospondin 1. *The Journal of cell biology* **130**, 503-506.

676 **Bruijn, L. I., Miller, T. M. and Cleveland, D. W.** (2004). Unraveling the mechanisms  
677 involved in motor neuron degeneration in ALS. *Annu. Rev. Neurosci.* **27**, 723-749.

678 **Chen, M. S., Huber, A. B., van der Haar, M. E., Frank, M., Schnell, L., Spillmann, A.**  
679 **A., Christ, F. and Schwab, M. E.** (2000). Nogo-A is a myelin-associated neurite  
680 outgrowth inhibitor and an antigen for monoclonal antibody IN-1. *Nature* **403**, 434.

681 **Chiurchiu, V., Maccarrone, M. and Orlicchio, A.** (2014). The role of reticulons in  
682 neurodegenerative diseases. *Neuromolecular medicine* **16**, 3-15.

683 **Christodoulou, A., Santarella-Mellwig, R., Santama, N. and Mattaj, I. W.** (2016).  
684 Transmembrane protein TMEM170A is a newly discovered regulator of ER and  
685 nuclear envelope morphogenesis in human cells. *Journal of cell science* **129**, 1552-

- 686 1565.
- 687 **Crawford, S. E., Stellmach, V., Murphy-Ullrich, J. E., Ribeiro, S. M., Lawler, J.,**  
688 **Hynes, R. O., Boivin, G. P. and Bouck, N.** (1998). Thrombospondin-1 is a major  
689 activator of TGF- $\beta$ 1 in vivo. *Cell* **93**, 1159-1170.
- 690 **Daughaday, W. and Deuel, T.** (1991). Tumor secretion of growth factors.  
691 *Endocrinology and metabolism clinics of North America* **20**, 539-563.
- 692 **Di Sano, F., Bernardoni, P. and Piacentini, M.** (2012). The reticulons: guardians of  
693 the structure and function of the endoplasmic reticulum. *Experimental cell research*  
694 **318**, 1201-1207.
- 695 **Dupuis, L., de Aguilar, J.-L. G., di Scala, F., Rene, F., de Tapia, M., Pradat, P.-F.,**  
696 **Lacomblez, L., Seihlan, D., Prinjha, R. and Walsh, F. S.** (2002). Nogo provides a  
697 molecular marker for diagnosis of amyotrophic lateral sclerosis. *Neurobiology of*  
698 *disease* **10**, 358-365.
- 699 **Friedman, J. R. and Voeltz, G. K.** (2011). The ER in 3D: a multifunctional dynamic  
700 membrane network. *Trends in cell biology* **21**, 709-717.
- 701 **Fromme, J. C. and Schekman, R.** (2005). COPII-coated vesicles: flexible enough for  
702 large cargo? *Current opinion in cell biology* **17**, 345-352.
- 703 **Gawantka, V., Ellinger-Ziegelbauer, H. and Hausen, P.** (1992). Beta 1-integrin is a  
704 maternal protein that is inserted into all newly formed plasma membranes during  
705 early *Xenopus* embryogenesis. *Development* **115**, 595-605.
- 706 **Goyal, U. and Blackstone, C.** (2013). Untangling the web: mechanisms underlying ER  
707 network formation. *Biochimica et biophysica acta* **1833**, 2492-2498.
- 708 **GrandPré, T., Nakamura, F., Vartanian, T. and Strittmatter, S. M.** (2000).  
709 Identification of the Nogo inhibitor of axon regeneration as a Reticulon protein.  
710 *Nature* **403**, 439.
- 711 **Hasegawa, T., Ohno, K., Sano, M., Omura, T., Omura, K., Nagano, A. and Sato, K.**  
712 (2005). The differential expression patterns of messenger RNAs encoding Nogo-A  
713 and Nogo-receptor in the rat central nervous system. *Brain research. Molecular*  
714 *brain research* **133**, 119-130.
- 715 **Hughes, H. and Stephens, D. J.** (2008). Assembly, organization, and function of the  
716 COPII coat. *Histochemistry and cell biology* **129**, 129-151.



- 717 **Hughes, H., Budnik, A., Schmidt, K., Palmer, K. J., Mantell, J., Noakes, C.,**  
718 **Johnson, A., Carter, D. A., Verkade, P. and Watson, P.** (2009). Organisation of  
719 human ER-exit sites: requirements for the localisation of Sec16 to transitional ER.  
720 *Journal of cell science* **122**, 2924-2934.
- 721 **Jensen, R. L., Ragel, B. T., Whang, K. and Gillespie, D.** (2006). Inhibition of hypoxia  
722 inducible factor-1 $\alpha$  (HIF-1 $\alpha$ ) decreases vascular endothelial growth factor (VEGF)  
723 secretion and tumor growth in malignant gliomas. *Journal of neuro-oncology* **78**,  
724 233-247.
- 725 **Jevtić, P. and Levy, D. L.** (2015). Nuclear size scaling during *Xenopus* early  
726 development contributes to midblastula transition timing. *Current Biology* **25**, 45-52.
- 727 **Jokic, N., de Aguilar, J. L. G., Dimou, L., Lin, S., Fergani, A., Ruegg, M. A., Schwab,**  
728 **M. E., Dupuis, L. and Loeffler, J. P.** (2006). The neurite outgrowth inhibitor Nogo -  
729 A promotes denervation in an amyotrophic lateral sclerosis model. *EMBO reports* **7**,  
730 1162-1167.
- 731 **Jones, T. R., Wiertz, E., Sun, L., Fish, K. N., Nelson, J. A. and Ploegh, H. L.** (1996).  
732 Human cytomegalovirus US3 impairs transport and maturation of major  
733 histocompatibility complex class I heavy chains. *Proceedings of the National*  
734 *Academy of Sciences* **93**, 11327-11333.
- 735 **Jordan, J. T., Sun, W., Hussain, S. F., DeAngulo, G., Prabhu, S. S. and Heimberger,**  
736 **A. B.** (2008). Preferential migration of regulatory T cells mediated by glioma-  
737 secreted chemokines can be blocked with chemotherapy. *Cancer Immunology,*  
738 *Immunotherapy* **57**, 123-131.
- 739 **Klopfenstein, D. R., Klumperman, J., Lustig, A., Kammerer, R. A., Oorschot, V. and**  
740 **Hauri, H.-P.** (2001). Subdomain-specific localization of CLIMP-63 (p63) in the  
741 endoplasmic reticulum is mediated by its luminal  $\alpha$ -helical segment. *The Journal of*  
742 *cell biology* **153**, 1287-1300.
- 743 **Lahav, J.** (1993). The functions of thrombospondin and its involvement in physiology  
744 and pathophysiology. *Biochimica et Biophysica Acta (BBA)-Molecular Basis of*  
745 *Disease* **1182**, 1-14.
- 746 **Lin, S., Sun, S. and Hu, J.** (2012). Molecular basis for sculpting the endoplasmic  
747 reticulum membrane. *The international journal of biochemistry & cell biology* **44**,

- 748 1436-1443.
- 749 **Lippincott-Schwartz, J., Roberts, T. H. and Hirschberg, K.** (2000). Secretory protein  
750 trafficking and organelle dynamics in living cells. *Annual review of cell and*  
751 *developmental biology* **16**, 557-589.
- 752 **Lodish, H., Berk, A., Darnell, J. E., Kaiser, C. A., Krieger, M., Scott, M. P.,**  
753 **Bretscher, A., Ploegh, H. and Matsudaira, P.** (2008). Molecular cell biology:  
754 Macmillan.
- 755 **Lynch, C. and Mobley, W.** (2000). Comprehensive Theory of Alzheimer's Disease: The  
756 Effects of Cholesterol on Membrane Receptor Trafficking. *Annals of the New York*  
757 *Academy of Sciences* **924**, 104-111.
- 758 **McCormick, D.** (1993). Secretion of cathepsin B by human gliomas in vitro.  
759 *Neuropathology and applied neurobiology* **19**, 146-151.
- 760 **Melero, A., Chiaruttini, N., Karashima, T., Riezman, I., Funato, K., Barlowe, C.,**  
761 **Riezman, H. and Roux, A.** (2018). Lysophospholipids Facilitate COPII Vesicle  
762 Formation. *Current biology : CB* **28**, 1950-1958 e1956.
- 763 **More, S. V., Kumar, H., Kim, I. S., Song, S.-Y. and Choi, D.-K.** (2013). Cellular and  
764 molecular mediators of neuroinflammation in the pathogenesis of Parkinson's  
765 disease. *Mediators of inflammation* **2013**.
- 766 **Oertle, T. and Schwab, M. E.** (2003). Nogo and its paRTNers. *Trends in cell biology* **13**,  
767 187-194.
- 768 **Park, S. H. and Blackstone, C.** (2010). Further assembly required: construction and  
769 dynamics of the endoplasmic reticulum network. *EMBO reports* **11**, 515-521.
- 770 **Phend, K. D., Rustioni, A. and Weinberg, R. J.** (1995). An osmium-free method of  
771 epon embedment that preserves both ultrastructure and antigenicity for post-  
772 embedding immunocytochemistry. *Journal of Histochemistry & Cytochemistry* **43**,  
773 283-292.
- 774 **Prinjha, R., Moore, S. E., Vinson, M., Blake, S., Morrow, R., Christie, G.,**  
775 **Michalovich, D., Simmons, D. L. and Walsh, F. S.** (2000). Neurobiology: Inhibitor  
776 of neurite outgrowth in humans. *Nature* **403**, 383.
- 777 **Puhka, M., Vihinen, H., Joensuu, M. and Jokitalo, E.** (2007). Endoplasmic reticulum  
778 remains continuous and undergoes sheet-to-tubule transformation during cell

- 779 division in mammalian cells. *The Journal of cell biology* **179**, 895-909.
- 780 **Ramo, O., Kumar, D., Gucciardo, E., Joensuu, M., Saarekas, M., Vihinen, H.,**  
781 **Belevich, I., Smolander, O. P., Qian, K., Auvinen, P. et al.** (2016). NOGO-  
782 A/RTN4A and NOGO-B/RTN4B are simultaneously expressed in epithelial, fibroblast  
783 and neuronal cells and maintain ER morphology. *Scientific reports* **6**, 35969.
- 784 **Romero-Brey, I. and Bartenschlager, R.** (2016). Endoplasmic Reticulum: The Favorite  
785 Intracellular Niche for Viral Replication and Assembly. *Viruses* **8**.
- 786 **Rose, A. E., Zhao, C., Turner, E. M., Steyer, A. M. and Schlieker, C.** (2014). Arresting  
787 a Torsin ATPase reshapes the endoplasmic reticulum. *The Journal of biological*  
788 *chemistry* **289**, 552-564.
- 789 **Schawkat, K., Di Santo, S., Seiler, S., Ducray, A. and Widmer, H. R.** (2015). Loss of  
790 Nogo-A-expressing neurons in a rat model of Parkinson's disease. *Neuroscience*  
791 **288**, 59-72.
- 792 **Schlaitz, A. L., Thompson, J., Wong, C. C., Yates, J. R., 3rd and Heald, R.** (2013).  
793 REEP3/4 ensure endoplasmic reticulum clearance from metaphase chromatin and  
794 proper nuclear envelope architecture. *Dev Cell* **26**, 315-323.
- 795 **Schuck, S., Prinz, W. A., Thorn, K. S., Voss, C. and Walter, P.** (2009). Membrane  
796 expansion alleviates endoplasmic reticulum stress independently of the unfolded  
797 protein response. *J Cell Biol* **187**, 525-536.
- 798 **Shibata, Y., Voeltz, G. K. and Rapoport, T. A.** (2006). Rough sheets and smooth  
799 tubules. *Cell* **126**, 435-439.
- 800 **Shibata, Y., Hu, J., Kozlov, M. M. and Rapoport, T. A.** (2009). Mechanisms shaping  
801 the membranes of cellular organelles. *Annual Review of Cell and Developmental* **25**,  
802 329-354.
- 803 **Shibata, Y., Shemesh, T., Prinz, W. A., Palazzo, A. F., Kozlov, M. M. and Rapoport,**  
804 **T. A.** (2010). Mechanisms determining the morphology of the peripheral ER. *Cell*  
805 **143**, 774-788.
- 806 **Shibata, Y., Voss, C., Rist, J. M., Hu, J., Rapoport, T. A., Prinz, W. A. and Voeltz, G.**  
807 **K.** (2008). The reticulon and DP1/Yop1p proteins form immobile oligomers in the  
808 tubular endoplasmic reticulum. *J Biol Chem* **283**, 18892-18904.
- 809 **Steiner, P., Kulangara, K., Sarria, J. C., Glauser, L., Regazzi, R. and Hirling, H.**

- 810 (2004). Reticulon 1-C/neuroendocrine-specific protein-C interacts with SNARE  
811 proteins. *Journal of neurochemistry* **89**, 569-580.
- 812 **Sun, W., Hu, W., Xu, R., Jin, J., Szulc, Z. M., Zhang, G., Galadari, S. H., Obeid, L. M.**  
813 **and Mao, C.** (2009). Alkaline ceramidase 2 regulates beta1 integrin maturation and  
814 cell adhesion. *FASEB journal : official publication of the Federation of American*  
815 *Societies for Experimental Biology* **23**, 656-666.
- 816 **Syed, G. H., Khan, M., Yang, S. and Siddiqui, A.** (2017). Hepatitis C virus  
817 lipovirions (HCV-LVP) assemble in the endoplasmic reticulum (ER) and bud off  
818 from the ER to Golgi in COPII vesicles. *Journal of virology*, JVI. 00499-00417.
- 819 **Tojima, T. and Kamiguchi, H.** (2015). Exocytic and endocytic membrane trafficking in  
820 axon development. *Development, growth & differentiation* **57**, 291-304.
- 821 **Urrea, H. and Hetz, C.** (2012). The ER in 4D: a novel stress pathway controlling  
822 endoplasmic reticulum membrane remodeling. *Cell death and differentiation* **19**,  
823 1893-1895.
- 824 **Voeltz, G. K. and Prinz, W. A.** (2007). Sheets, ribbons and tubules—how organelles  
825 get their shape. *Nature Reviews Molecular Cell Biology* **8**, 258.
- 826 **Voeltz, G. K., Prinz, W. A., Shibata, Y., Rist, J. M. and Rapoport, T. A.** (2006). A  
827 class of membrane proteins shaping the tubular endoplasmic reticulum. *Cell* **124**,  
828 573-586.
- 829 **Wakana, Y., Koyama, S., Nakajima, K., Hatsuzawa, K., Nagahama, M., Tani, K.,**  
830 **Hauri, H. P., Melancon, P. and Tagaya, M.** (2005). Reticulon 3 is involved in  
831 membrane trafficking between the endoplasmic reticulum and Golgi. *Biochemical*  
832 *and biophysical research communications* **334**, 1198-1205.
- 833 **Wang, X., Li, S., Wang, H., Shui, W. and Hu, J.** (2017). Quantitative proteomics reveal  
834 proteins enriched in tubular endoplasmic reticulum of *Saccharomyces cerevisiae*.  
835 *eLife* **6**.
- 836 **West, M., Zurek, N., Hoenger, A. and Voeltz, G. K.** (2011). A 3D analysis of yeast ER  
837 structure reveals how ER domains are organized by membrane curvature. *The*  
838 *Journal of cell biology* **193**, 333-346.
- 839 **Wikstrom, J. D., Israeli, T., Bachar-Wikstrom, E., Swisa, A., Ariav, Y., Waiss, M.,**  
840 **Kaganovich, D., Dor, Y., Cerasi, E. and Leibowitz, G.** (2013). AMPK regulates ER

- 841 morphology and function in stressed pancreatic beta-cells via phosphorylation of  
842 DRP1. *Molecular endocrinology* **27**, 1706-1723.
- 843 **Xiong, N.-X., Pu, J.-Z., Zhao, H.-Y. and Zhang, F.-C.** (2008). Effect of Nogo-A gene  
844 inhibition on dopamine release in PC12 cells. *Neuro endocrinology letters* **29**, 884-  
845 888.
- 846 **Yan, R., Shi, Q., Hu, X. and Zhou, X.** (2006). Reticulon proteins: emerging players in  
847 neurodegenerative diseases. *Cellular and Molecular Life Sciences CMLS* **63**, 877-  
848 889.
- 849 **Yang, Y. S. and Strittmatter, S. M.** (2007). The reticulons: a family of proteins with  
850 diverse functions. *Genome Biol* **8**, 234.
- 851 **Zahnleiter, D., Hauer, N. N., Kessler, K., Uebe, S., Sugano, Y., Neuhauss, S. C.,**  
852 **Giessl, A., Ekici, A. B., Blessing, H., Sticht, H. et al.** (2015). MAP4-dependent  
853 regulation of microtubule formation affects centrosome, cilia, and Golgi architecture  
854 as a central mechanism in growth regulation. *Human mutation* **36**, 87-97.
- 855 **Zhang, H. and Hu, J.** (2016). Shaping the Endoplasmic Reticulum into a Social  
856 Network. *Trends in cell biology* **26**, 934-943.
- 857 **Zhong, J., Fan, S., Yan, Z., Xiao, S., Wan, L., Chen, C., Zhong, S., Liu, L. and Liu, J.**  
858 (2015). Effects of Nogo-A Silencing on TNF-alpha and IL-6 Secretion and TH  
859 Downregulation in Lipopolysaccharide-Stimulated PC12 Cells. *BioMed research*  
860 *international* **2015**, 817914.
- 861 **Zurek, N., Sparks, L. and Voeltz, G.** (2011). Reticulon short hairpin transmembrane  
862 domains are used to shape ER tubules. *Traffic* **12**, 28-41.

863

## 864 **FIGURE LEGENDS**

865 **Figure 1. Rtn4a overexpression increases cell surface localization of Integrin $\beta$ 1**  
866 **and HLA-A, without changing their total cellular levels.** HeLa cells were transiently  
867 transfected with plasmids expressing GFP-NLS as a control or Rtn4a-GFP (green). **(A-**  
868 **B)** Non-permeabilized cells were stained for surface-localized Integrin $\beta$ 1 **(A, red)** or  
869 HLA-A **(B, red)** and DNA (blue). **(C)** Integrin $\beta$ 1 surface fluorescence staining intensity  
870 was quantified for 39-52 cells per condition. **(D)** HLA-A surface fluorescence staining  
871 intensity was quantified for 59-69 cells per condition. **(E-F)** Permeabilized cells were

872 stained for total Integrin $\beta$ 1 (**E**, red) or HLA-A (**F**, red) and DNA (blue). (**G**) Total  
873 Integrin $\beta$ 1 fluorescence staining intensity was quantified for 39-49 cells per condition. (**H**)  
874 Total HLA-A fluorescence staining intensity was quantified for 48-52 cells per condition.  
875 Scale bars are 10  $\mu$ m and images are maximum intensity projections of confocal z-  
876 stacks. Error bars represent standard deviation. \*\*\*\*  $p \leq 0.0001$ ; NS not significant.

877

878 **Figure 2. Rtn4a overexpression increases the proportion of mature forms of**  
879 **Integrin $\beta$ 1 and HLA-A.** HeLa cells were transiently transfected with plasmids  
880 expressing GFP-NLS as a control or Rtn4a-GFP. Whole cell lysates were subjected to  
881 gel electrophoresis, with or without prior endoglycosidase H digestion (EndoH), and  
882 immunoblotted for Integrin $\beta$ 1, HLA-A, and  $\beta$ -Actin. (**A**) Integrin $\beta$ 1 band intensities were  
883 quantified and normalized to  $\beta$ -Actin. (**B**) The proportion of Integrin $\beta$ 1 mature forms was  
884 calculated by dividing the normalized EndoH-treated band intensity by the normalized  
885 untreated band intensity. (**C**) HLA-A band intensities were quantified and normalized to  
886  $\beta$ -Actin. (**D**) The proportion of HLA-A mature forms was calculated by dividing the  
887 normalized EndoH-treated band intensity by the normalized untreated band intensity.  
888 Quantifications were performed from three independent experiments. Error bars  
889 represent standard deviation. \*\*  $p \leq 0.01$ ; \*  $p \leq 0.05$ ; NS not significant.

890

891 **Figure 3. Knockdown of Rtn4 decreases cell surface localization of Integrin $\beta$ 1 and**  
892 **HLA-A without affecting ER sheet volume.** HeLa cells were transiently co-transfected  
893 with siRNA against Rtn4 and Block-iT fluorescent control siRNA or with Block-iT alone  
894 (red). (**A**) Cells were immunostained for Rtn4 (green) and DNA (blue). (**B**) Average  
895 fluorescence intensity of Rtn4 immunostaining was quantified for 30-36 cells per  
896 condition. (**C-D**) Non-permeabilized cells were stained for surface-localized Integrin $\beta$ 1  
897 (**C**, green) or HLA-A (**D**, green) and DNA (blue). (**E**) Integrin $\beta$ 1 surface fluorescence  
898 staining intensity was quantified for 39-51 cells per condition. (**F**) HLA-A surface  
899 fluorescence staining intensity was quantified for 34-51 cells per condition. (**G**) Cells  
900 were stained for ER sheet marker CLIMP63 (green) and DNA (blue). (**H**) Mean ER  
901 sheet volume based on CLIMP63 immunofluorescence was quantified from 3D  
902 reconstructed confocal z-stacks. 35-57 cells were quantified for each condition.

903 Scale bars are 10  $\mu$ m. Images are maximum intensity projections of confocal z-stacks.  
904 Error bars represent standard deviation. \*\*\*\*  $p \leq 0.0001$ ; \*\*  $p \leq 0.01$ ; NS not significant.

905

906 **Figure 4. Overexpression of Rtn4a increases the secretion of endogenous FBLN5**  
907 **and TSP1.** HeLa cells were transiently nucleofected with plasmids expressing GFP-  
908 NLS as a control or Rtn4a-GFP. Media was collected and whole cell lysates were  
909 prepared 12 hours post transfection. Samples were subjected to sandwich ELISA. **(A,D)**  
910 Amounts of secreted FBLN5 (A) and TSP1 (D) present in the media were quantified by  
911 ELISA and normalized to the number of live cells. **(B,E)** Amounts of intracellular FBLN5  
912 (B) and TSP1 (E) present in whole cell lysates were quantified by ELISA and  
913 normalized to the number of live cells. **(C,F)** Total amounts of FBLN5 (C) and TSP1 (F)  
914 were calculated by summing the secreted and intracellular amounts of each protein per  
915 cell.

916 Data are presented from three independent experiments. Error bars represent standard  
917 deviation. \*\*\*  $p \leq 0.001$ ; \*\*  $p \leq 0.01$ ; \*  $p \leq 0.05$ ; NS not significant.

918

919 **Figure 5. Overexpression of Rtn4a accelerates trafficking of ectopically**  
920 **expressed mCherry-LAMP1.** HeLa cells were transiently co-transfected with plasmids  
921 expressing GFP-NLS as a control or Rtn4a-GFP (green) and the RUSH construct Str-  
922 li\_LAMP1-SBP-mCherry (red). ER-trapped LAMP1 was released by addition of 40  $\mu$ M  
923 D-Biotin to the growth media. **(A)** Cells fixed before biotin addition and at the indicated  
924 15-minute intervals were imaged.

925 Scale bars are 10  $\mu$ m. Images are maximum intensity projections of confocal z-stacks.

926

927 **Figure 6. Rtn4a overexpression accelerates trafficking of LAMP1 from the ER to**  
928 **the Golgi.** HeLa cells were transiently co-transfected with plasmids expressing GFP-  
929 NLS as a control or Rtn4a-GFP (green) and the RUSH construct Str-li\_LAMP1-SBP-  
930 mCherry (red). ER-trapped LAMP1 was released by addition of 40  $\mu$ M D-Biotin to the  
931 growth media. Live cell imaging was performed at 90-second intervals. **(A,D)**  
932 Representative images prior to biotin addition. **(B,E)** Representative images at 3-minute  
933 intervals after biotin addition. **(C,F)** In control cells (C) and Rtn4a-GFP transfected cells

934 (F), integrated density of mCherry-LAMP1 fluorescence was measured for the indicated  
935 brighter perinuclear clusters and dimmer perinuclear regions. **(G-H)** To estimate  
936 accumulation of LAMP1 in the Golgi over time, the integrated density of the brighter  
937 perinuclear LAMP1 signal was divided by the integrated density of the dimmer  
938 perinuclear LAMP1 signal at each time point. The peaks indicated by arrows at 15  
939 minutes for the control and 6 minutes for Rtn4a overexpression represent the highest  
940 relative accumulation of LAMP1 in the Golgi.

941 4-5 cells were quantified per condition based on live time-lapse imaging of single z-  
942 planes. Scale bars are 10  $\mu\text{m}$ . Error bars represent standard deviation.

943

944 **Figure 7. Rtn4a overexpression causes Golgi fragmentation and enlargement.**

945 HeLa cells were transiently transfected with plasmids expressing GFP-NLS as a control  
946 or Rtn4a-GFP (green). **(A)** Cells were stained for medial Golgi marker ManII (red) and  
947 DNA (blue). **(B-C)** Golgi circularity (B) and volume (C) were quantified based on ManII  
948 staining for 26-29 cells per condition. Volume was quantified from 3D reconstructed  
949 confocal z-stacks. **(D)** Cells were stained for Golgi marker GRASP65 (red) and DNA  
950 (blue). **(E-F)** Golgi circularity (E) and volume (F) were quantified based on GRASP65  
951 staining for 38-41 cells per condition. Volume was quantified from 3D reconstructed  
952 confocal z-stacks.

953 Scale bars are 10  $\mu\text{m}$  and images are maximum intensity projections of confocal z-  
954 stacks. Error bars represent standard deviation. \*\*\*\*  $p < 0.0001$ ; \*\*\*  $p < 0.001$ ; \*\*  $p < 0.01$ .

955

956 **Figure 8. Overexpressed Rtn4a increases Sec31A staining area and co-**

957 **immunoprecipitates with Sec31A vesicles.** HeLa cells were transiently transfected  
958 with plasmids expressing GFP-NLS as a control or Rtn4a-GFP (green). **(A)** Cells were  
959 immunostained for COPII coat marker Sec31A (red) and ER sheet marker CLIMP63  
960 (blue). **(B)** Total area of Sec31A staining was quantified for 52-68 cells per condition. **(C)**  
961 A magnified image of the white box in (A) showing the Rtn4a-GFP/Sec31A merge in an  
962 Rtn4a overexpressing cell. Sec31A shows close alignment with ER tubules. **(D-E)**  
963 Detergent-free cell homogenates with intact membranes from control and Rtn4a-GFP  
964 transfected cells were subjected to immunoprecipitation using an anti-Sec31A antibody



965 or mouse IgG<sub>2a</sub>. In (D), immunoprecipitated samples were immunoblotted for Sec31A  
966 (top) and Rtn4a (bottom). In (E), whole cell lysates were immunoblotted for Sec31A.  
967 Scale bars are 10  $\mu$ m. Images are maximum intensity projections of confocal z-stacks.  
968 Error bars represent standard deviation. \*  $p \leq 0.05$ .

969

970 **Figure 9. Overexpressed Rtn4a closely associates with Sec31A-containing**  
971 **vesicles and tubules.** HeLa cells were transiently transfected with plasmids expressing  
972 GFP-NLS as a control or Rtn4a-GFP. Cells were processed for TEM, and immuno-gold  
973 labeling was performed to label Rtn4 with 6 nm gold particles and Sec31A with 15 nm  
974 gold particles. **(A-B)** Representative immuno-TEM micrographs of cells showing  
975 membrane bound vesicles (turquoise arrowheads) and tubules (yellow arrowheads).  
976 Red arrows denote single or multiple 6 nm gold particles corresponding to Rtn4a. 15 nm  
977 gold particles marked by black arrowheads represent Sec31A. **(C)** To quantify the  
978 density of 6 nm particles close to a 15 nm particle, the number of 6 nm particles was  
979 counted within a 100 nm radius circle around a 15 nm particle (85 – 127 15 nm particles  
980 per condition). To quantify the density of 6 nm particles in regions devoid of 15 nm  
981 particles, the number of 6 nm particles was counted within randomly selected 100 nm  
982 radius circles (255 - 286 randomly selected 100 nm radius circles per condition). **(D)**  
983 The distances between a 15 nm particle and the nearest 6 nm particle were quantified  
984 for 85-129 15 nm particles per condition.  
985 7-10 50 nm ultra-thin sections were analyzed per condition. Scale bars are 100 nm.  
986 Error bars represent standard deviation. \*\*\*\*  $p \leq 0.0001$ ; NS not significant.

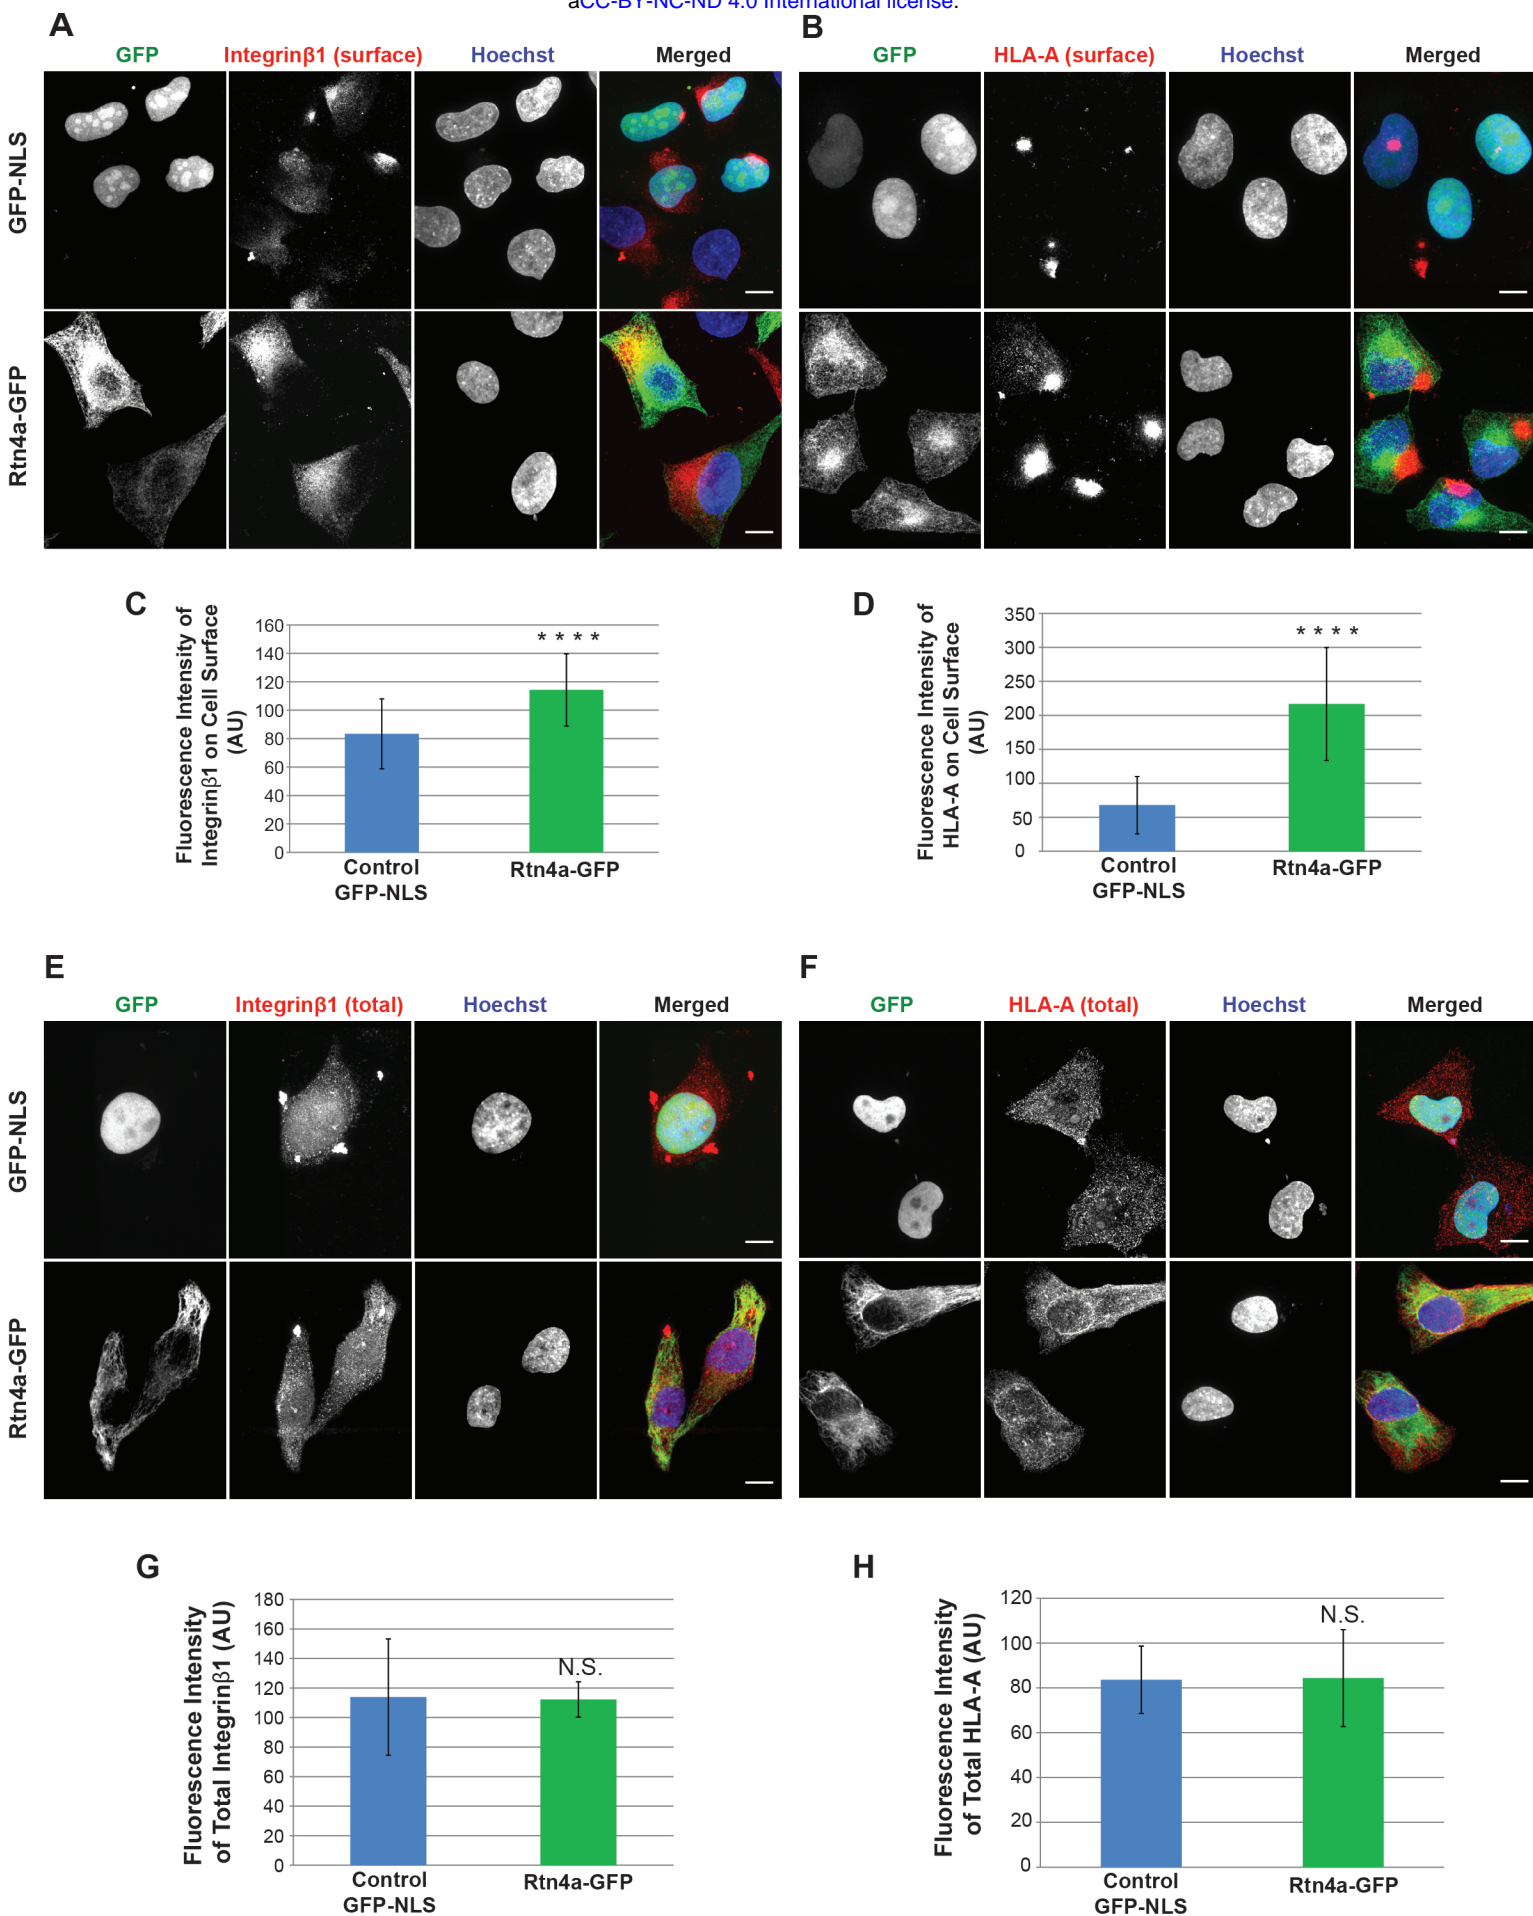

**Figure 2****A**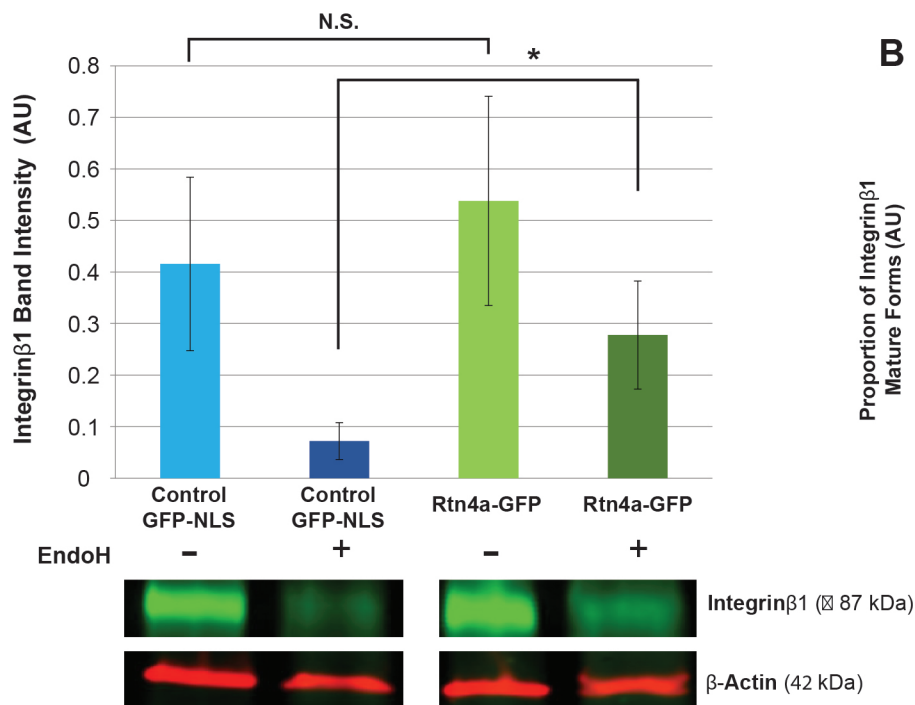**B**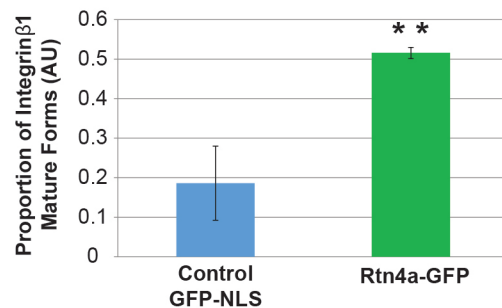**C**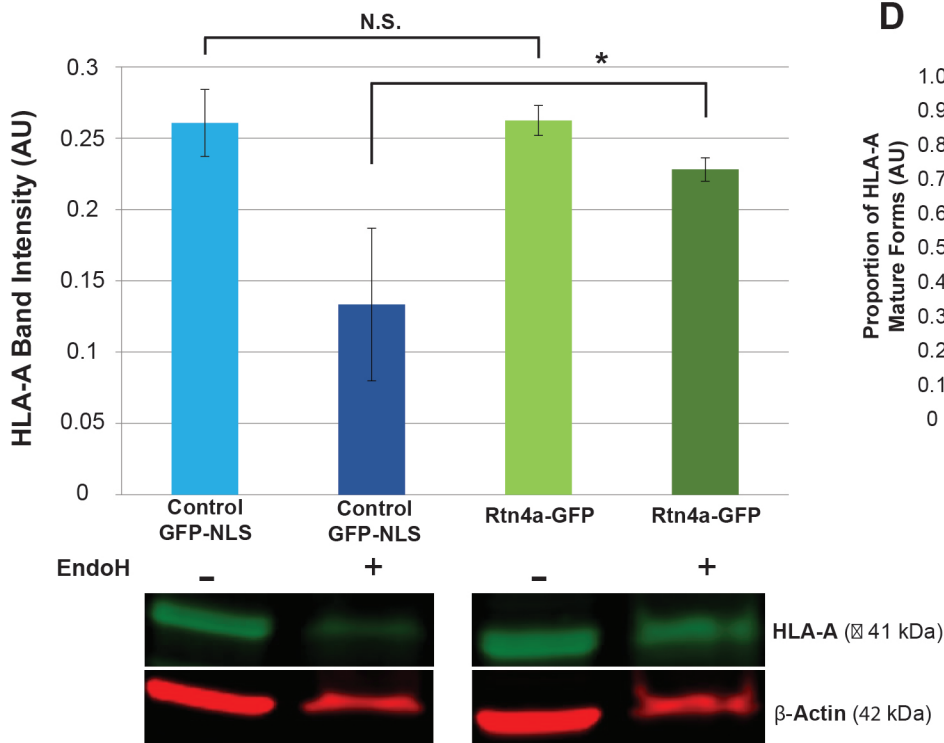**D**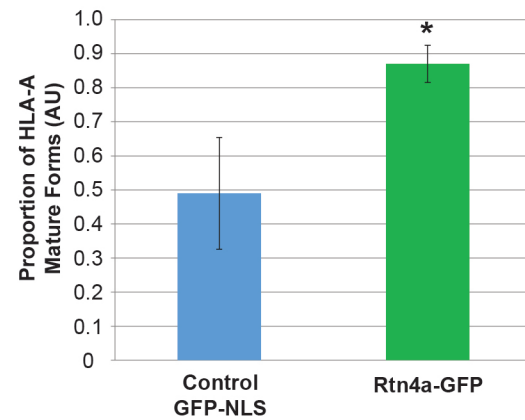

## Figure 3

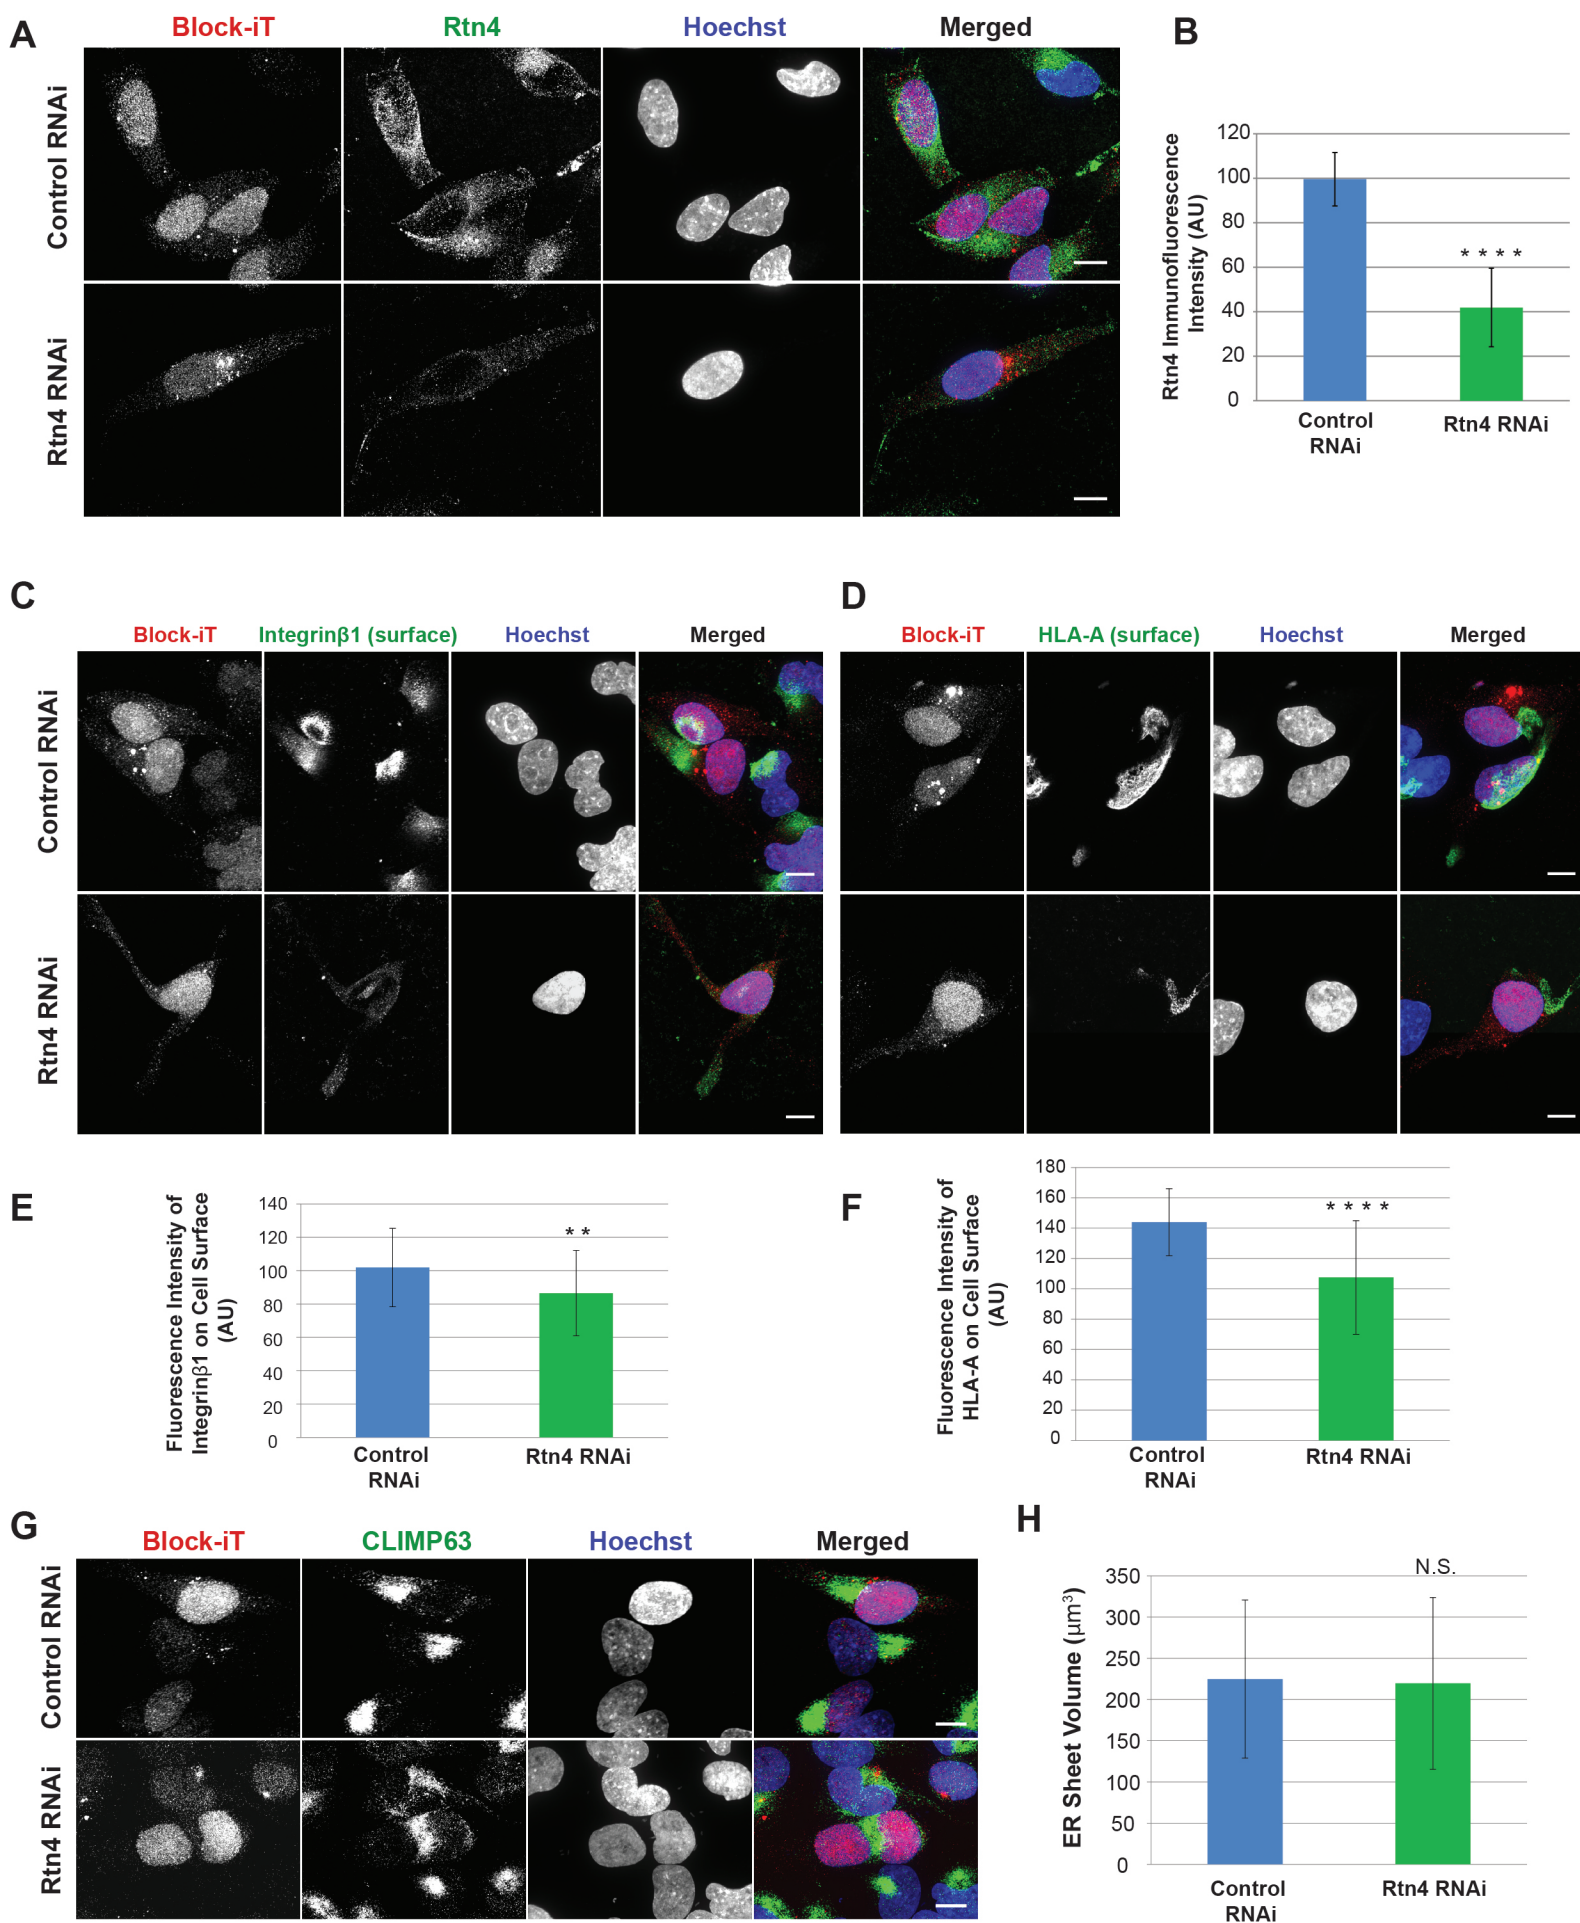

# Figure 4

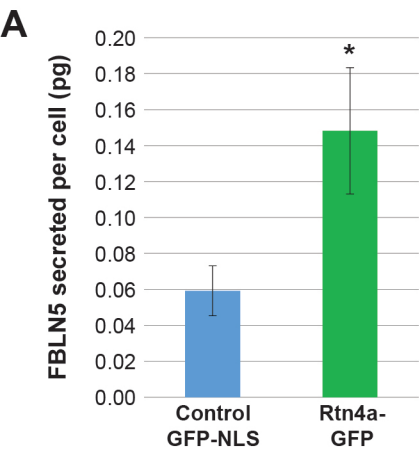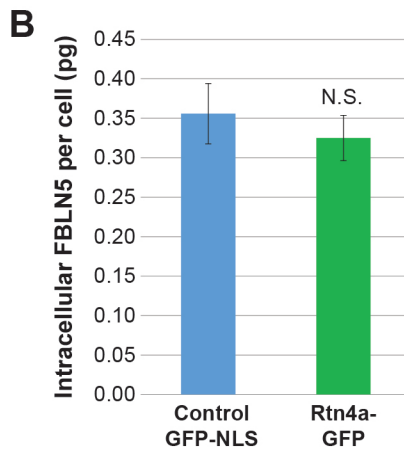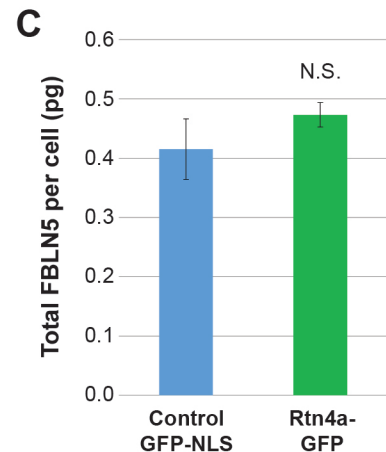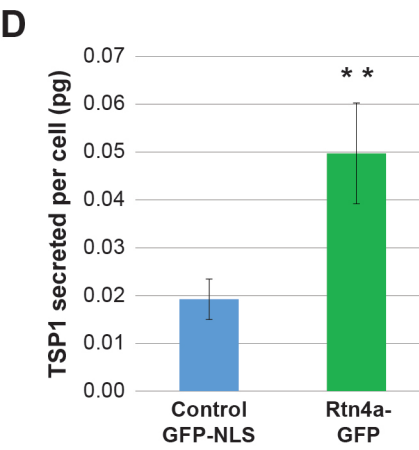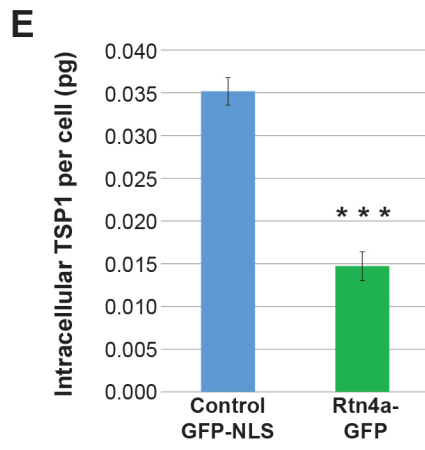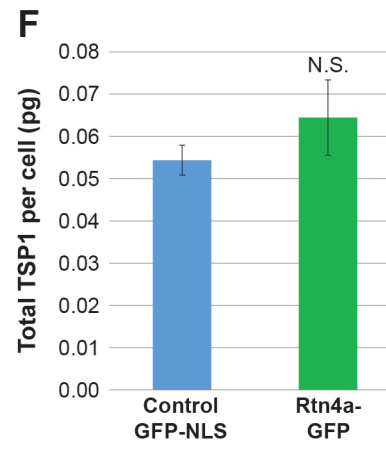

# Figure 5

## A

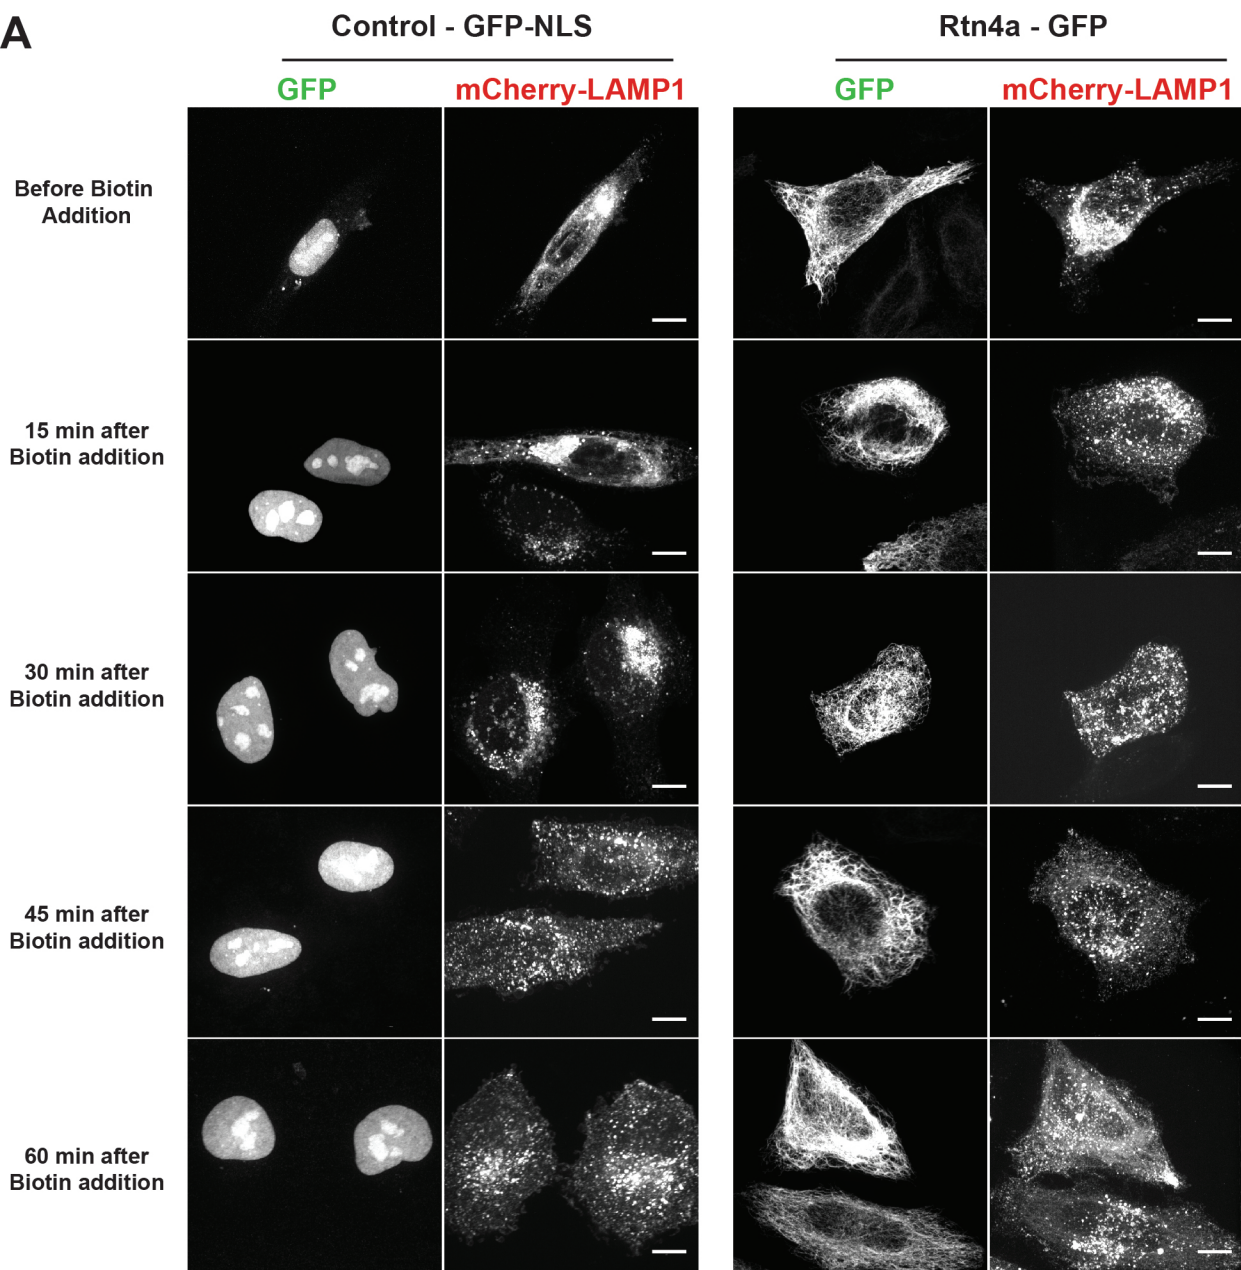

# Figure 6

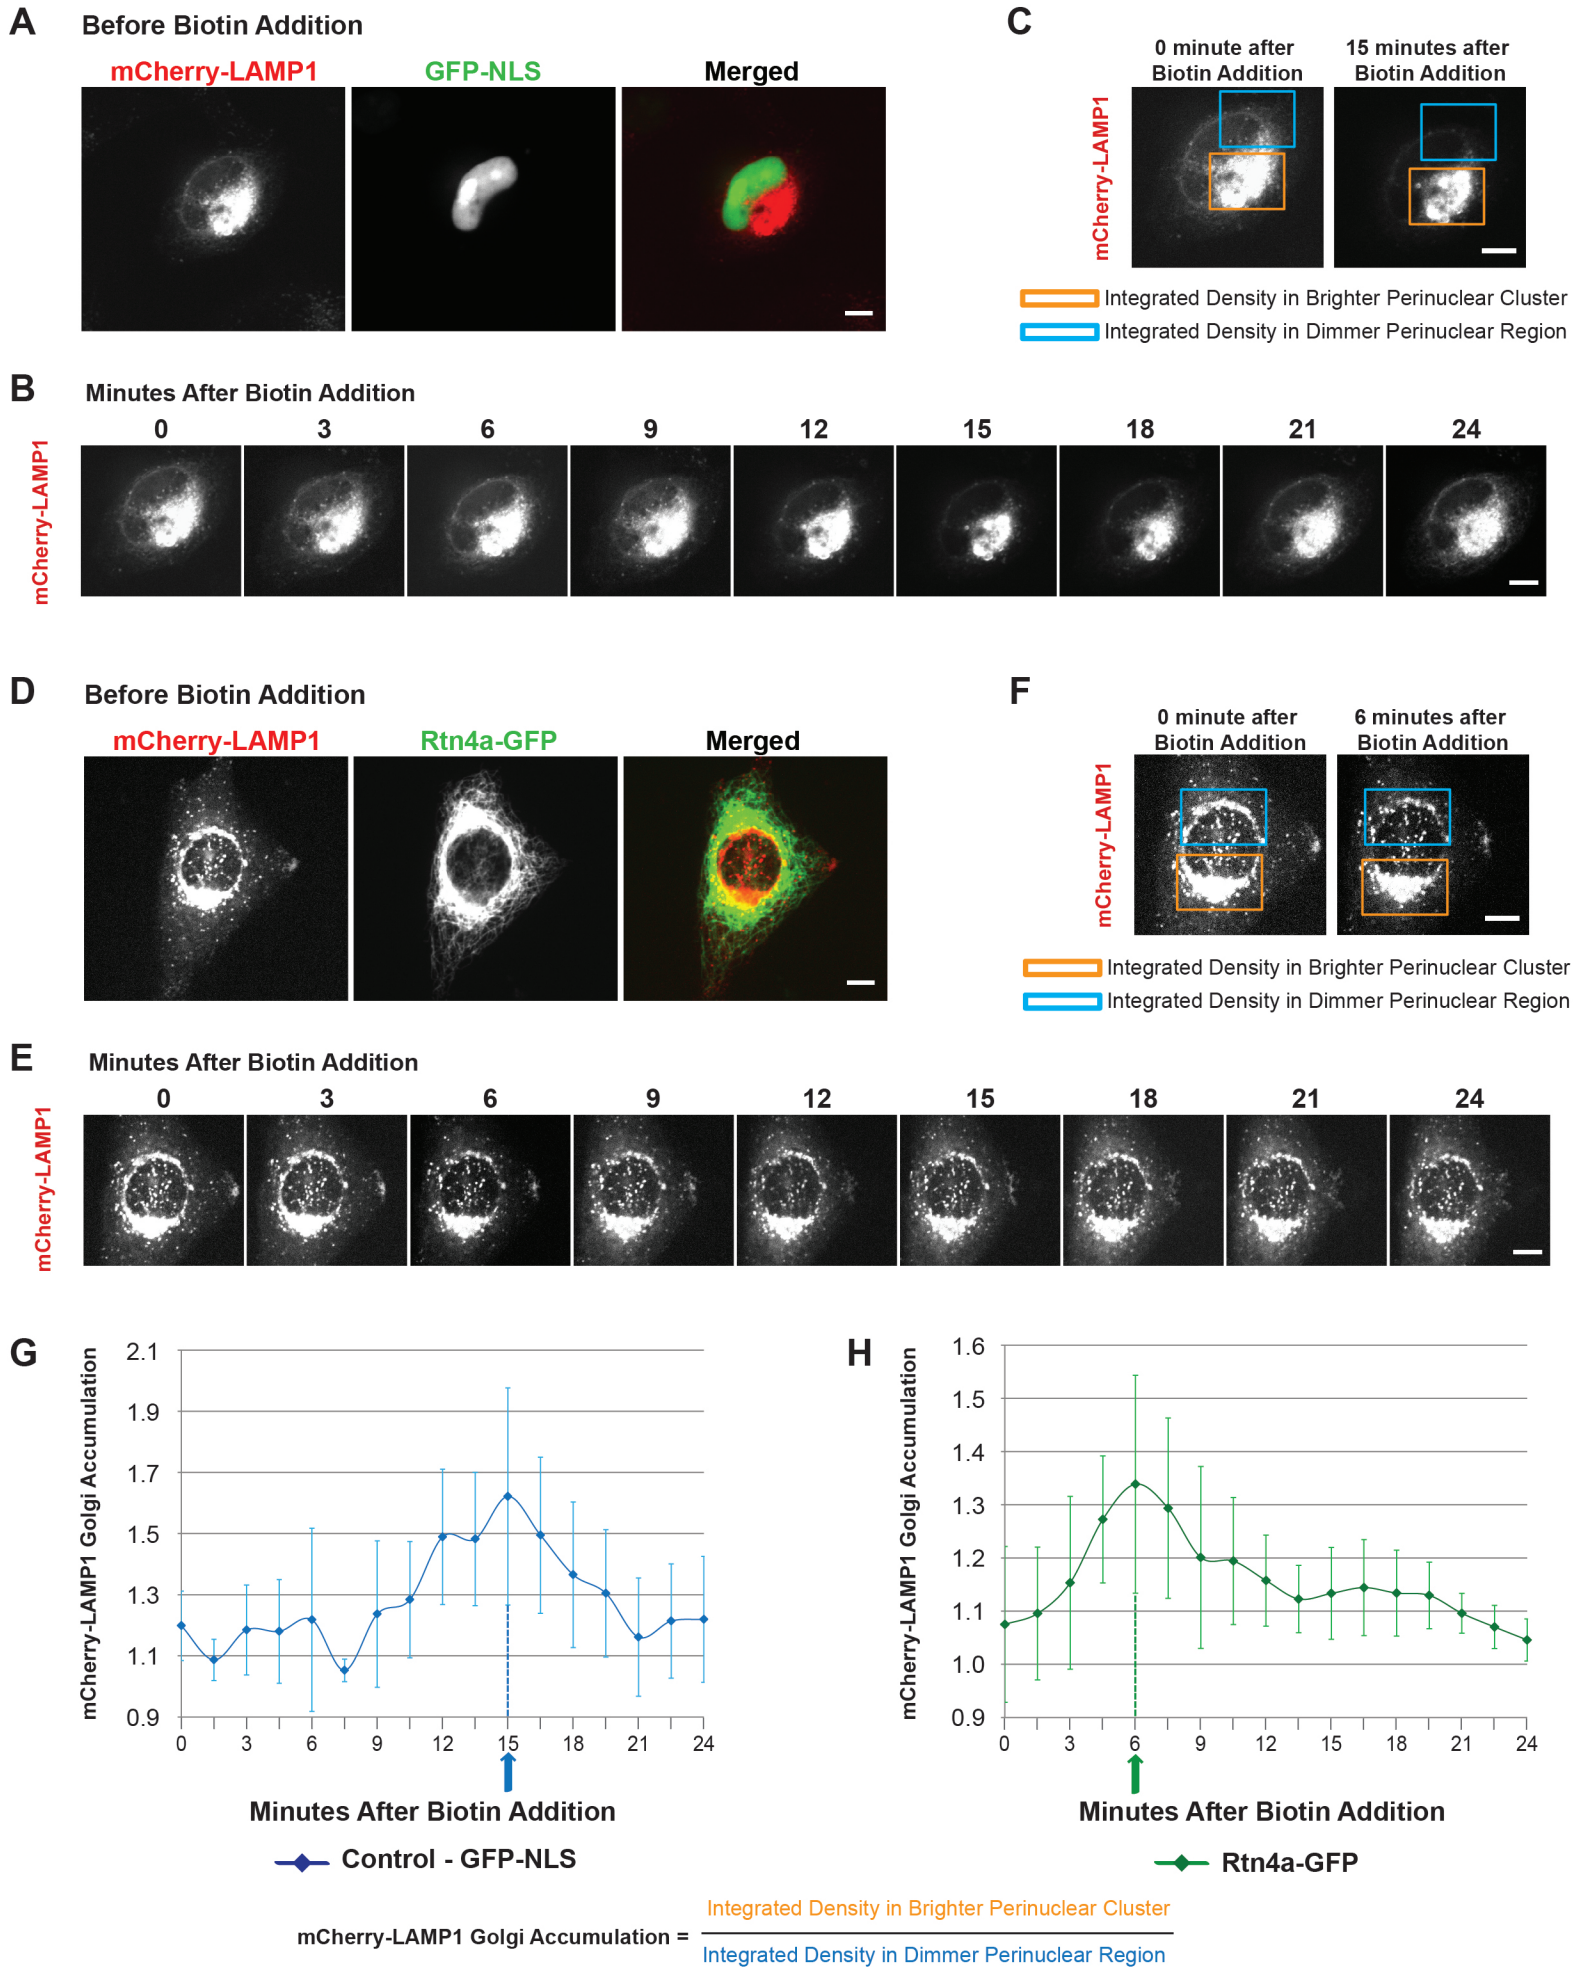

# Figure 7

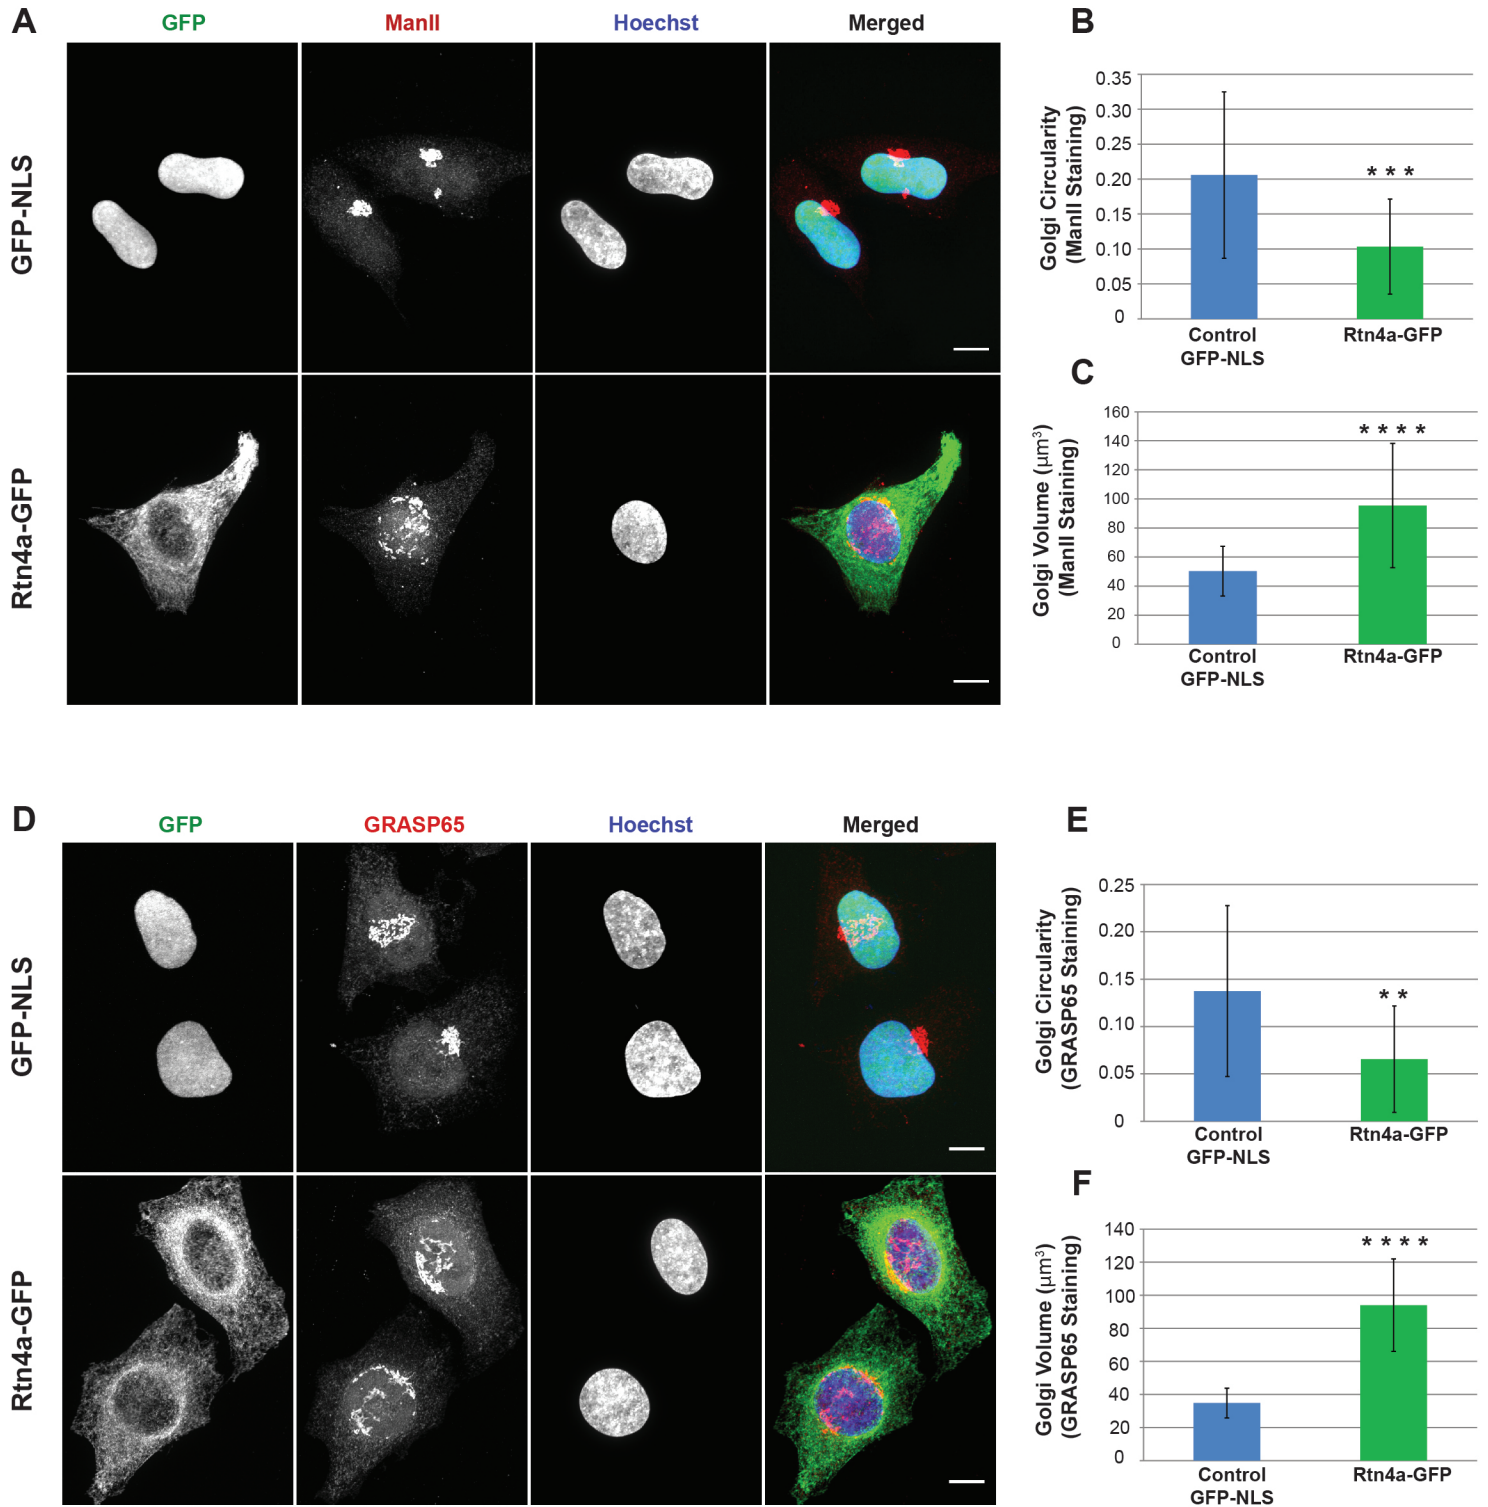



**Figure 8****A**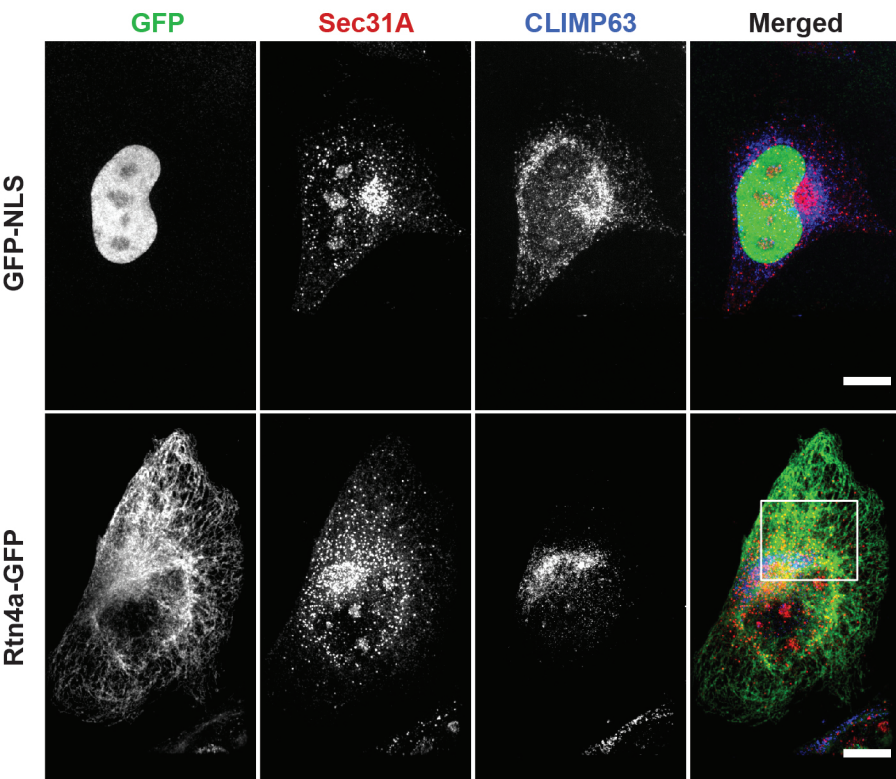**B**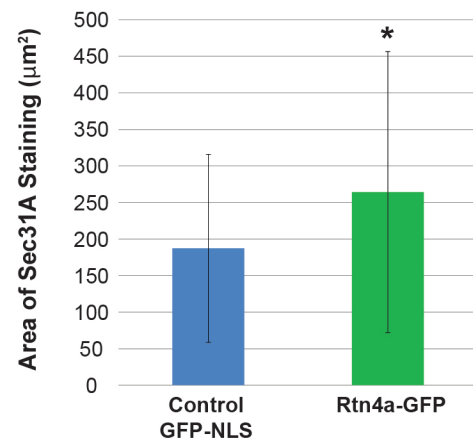**C**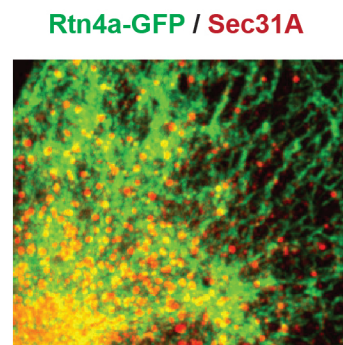**D**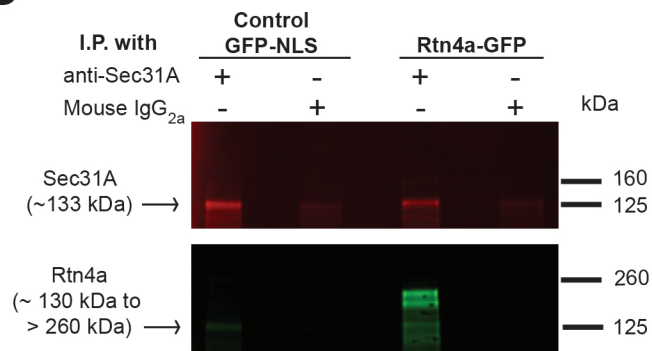**E**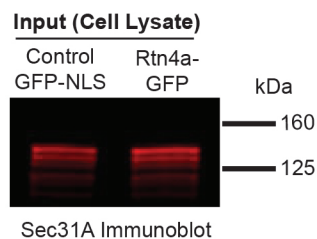

# Figure 9

**A**

**Control - GFP-NLS**

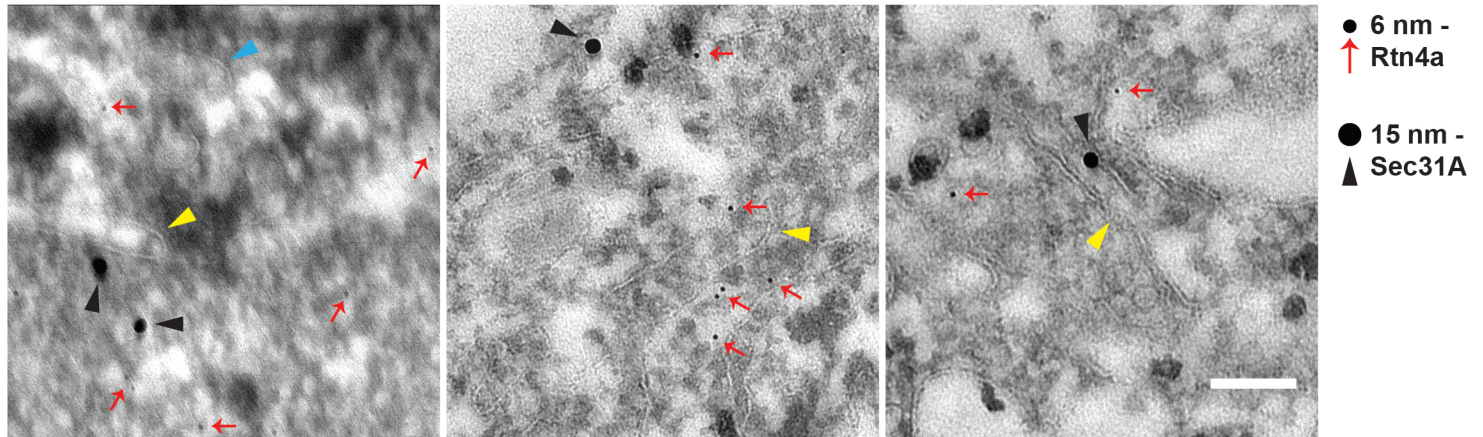

**B**

**Rtn4a-GFP**

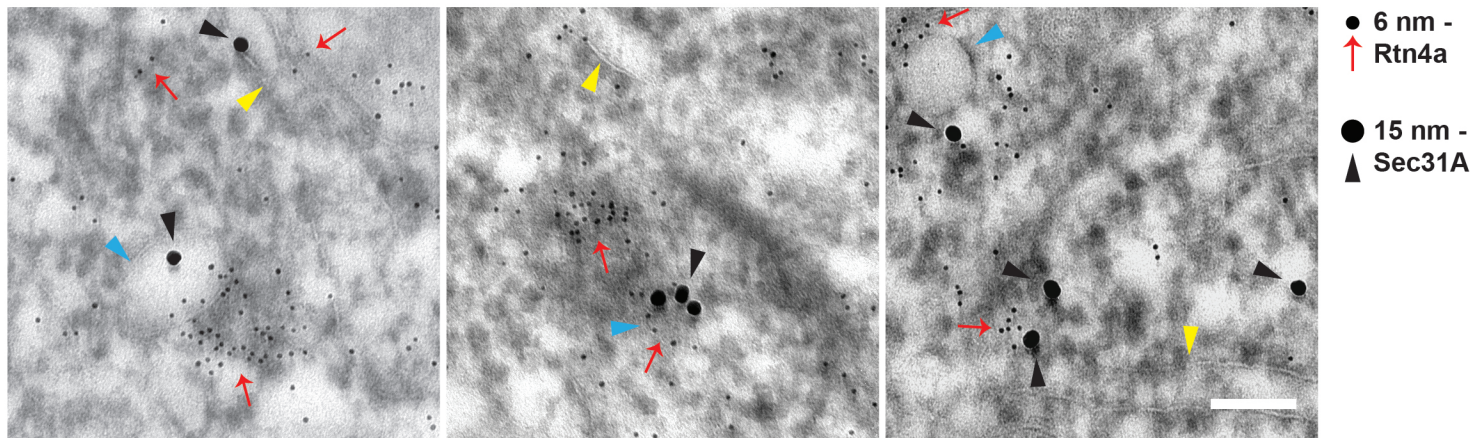

**C**

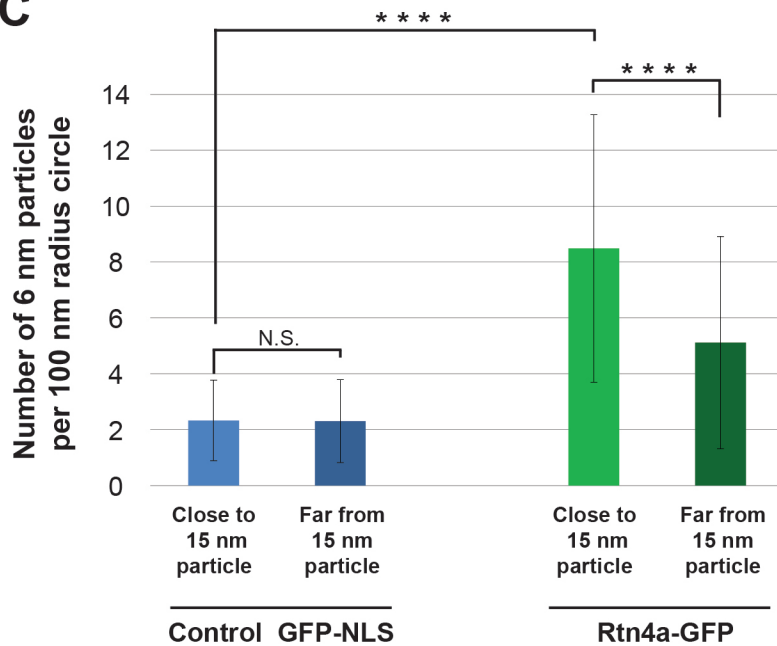

**D**

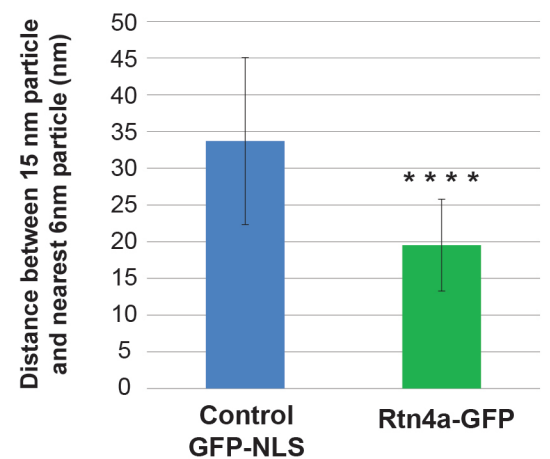

Source: https://www.biorxiv.org/content/10.1101/512129v1.full.pdf
